1 **Src-transformed cells hijack mitosis to extrude from the epithelium**

2

3 Katarzyna A. Anton<sup>1</sup>, Mihoko Kajita<sup>2</sup>, Rika Narumi<sup>2</sup>, Yasuyuki Fujita<sup>2</sup> and Masazumi Tada<sup>1\*</sup>

4

5 <sup>1</sup> University College London, Department of Cell & Developmental Biology, London, UK

6 <sup>2</sup> Division of Molecular Oncology, Institute for Genetic Medicine, Hokkaido University

7 Graduate School of Chemical Sciences and Engineering, Sapporo, Japan

8

9 \* Corresponding author: [m.tada@ucl.ac.uk](mailto:m.tada@ucl.ac.uk)

10

11 Key words: Src, oncogene, extrusion, zebrafish, epithelium, enveloping layer, mitosis,  
12 cytokinesis, Anillin

13 **At the initial stage of carcinogenesis single mutated cells appear within an**  
14 **epithelium. Mammalian *in vitro* experiments show that potentially cancerous cells**  
15 **undergo live apical extrusion from normal monolayers. However, the mechanism**  
16 **underlying this process *in vivo* remains poorly understood. Mosaic expression of**  
17 **the oncogene vSrc in a simple epithelium of the early zebrafish embryo results in**  
18 **apical extrusion of transformed cells. Here we find that during extrusion**  
19 **components of the cytokinetic ring are recruited to adherens junctions of**  
20 **transformed cells, stimulating formation of a misoriented pseudo cytokinetic ring.**  
21 **During extrusion, the ring constricts and separates the basal from the apical part of**  
22 **the cell releasing both from the epithelium. This process requires cell cycle**  
23 **progression and occurs immediately after vSrc-transformed cell enters mitosis. To**  
24 **achieve extrusion, vSrc coordinates cell cycle progression, junctional integrity, cell**  
25 **survival and apicobasal polarity. Without vSrc, modulating these cellular processes**  
26 **reconstitutes vSrc-like extrusion, confirming their sufficiency for this process.**  
27

28 At early stages of epithelial carcinogenesis, single mutations arise in single cells residing  
29 among normal epithelial neighbours within functioning organisms. In the past 10 years  
30 several laboratories around the world started uncovering a process called epithelial  
31 defence against cancer (EDAC)<sup>1</sup>. This is defined as a non-immunological primary defence  
32 mechanism whereby cells within an epithelial monolayer have the ability to sense a  
33 mutated neighbour and trigger pathways leading to its elimination. Although more recently  
34 the focus lied on the role non-transformed neighbours in EDAC<sup>2-5</sup>, there is evidence that  
35 transformed cells themselves have to undergo specific changes in the process of  
36 extrusion<sup>6-10</sup>. For example, in the case of vSrc-transformed cells (here referred to as vSrc  
37 cells), myosin activity regulated by myosin light chain kinase (MLCK) and Rho kinase  
38 (ROCK) as well as focal adhesion kinase (FAK) drive basal relocation of adherens  
39 junctions followed by apical extrusion<sup>8</sup>. Apart from mechanical shape adaptations,  
40 transformed cells residing among normal neighbours were also shown to undergo changes  
41 in basic cellular functions, leading to altered metabolism<sup>9</sup> and endocytosis<sup>10</sup>. Until now,  
42 however, most studies of oncogenic cell extrusion have been performed using tissue  
43 culture models, cell lines and organoids, where cells are studied in environments different  
44 from the situation *in vivo*, such as matrix composed of just one protein, e.g. collagen I<sup>7</sup>, or  
45 glass<sup>11</sup>, a material of very high rigidity. These variable culturing conditions are known to  
46 affect cellular phenotype, behaviour and, especially, adhesion and cytoskeletal dynamics  
47 <sup>12,13</sup>. Oncogenic cell extrusion requires a number of complex rearrangements within a fully  
48 differentiated epithelium, as well as determination of the direction of extrusion, as cells  
49 may either be extruded apically or basally<sup>14</sup>. Therefore, it is important to investigate this  
50 phenomenon within a living organism, where cells can extrude and delaminate freely.

51  
52 Here, we performed a comprehensive mechanistic study of cell extrusion in living  
53 vertebrate embryos of zebrafish. Our model epithelium was the enveloping layer (EVL), the  
54 first polarised simple squamous epithelium that surrounds the yolk in the process of  
55 epiboly during gastrulation<sup>15</sup>. Unlike the *Drosophila* wing disc, the EVL is not pre-patterned  
56 in the anteroposterior and dorsoventral axes<sup>16</sup>, providing us with a homogenous cell  
57 population to study extrusion. Using the EVL-specific promoter Krt18, we established a  
58 system in which the tamoxifen-inducible transcriptional activator Gal4 (KaTA4-ERT2) was  
59 expressed exclusively within the EVL of the early embryo<sup>3,10</sup> (Fig. 1A). In order to obtain  
60 mosaic inducible expression of a given oncogene, imitating early stages of carcinogenesis,

61 we transiently injected constructs encoding oncogenes under the control of a UAS or  
62 double UAS (dUAS driving bi-directional expression) element at one cell stage. We have  
63 also created a double Krt18 promoter (dKrt18; Fig. S1A, B) resulting in constitutive  
64 expression of additional modulators of extrusion within the EVL. Thus, this *in vivo* system  
65 is reminiscent of *in vitro* models and the process of *in vivo* carcinogenesis, allowing us to  
66 generate two discrete cell populations: transformed and normal cells in a differentiated  
67 homogenous tissue.

68  
69 Using this model, we document details of vSrc cell extrusion in the zebrafish EVL based on  
70 high-resolution live imaging. This approach uncovered a novel mode of extrusion in which  
71 vSrc holds the cell in the G2 phase of the cell cycle until a misoriented pseudo cytokinetic  
72 ring is formed and constricted in early mitosis, resulting in the cell leaving the epithelium.

## 73 74 **Results**

75  
76 **vSrc-transformed cells are apicobasally extruded from the zebrafish embryonic**  
77 **epithelium in a cell-death independent manner.** We previously showed that when the  
78 oncogene vSrc was mosaically expressed in the EVL, transformed cells were apically  
79 extruded from the epithelium (outside of the embryo)<sup>8</sup> (Fig. 1B, Movie 1). Further careful  
80 investigation of this process through live imaging revealed that transformed cells round up  
81 (become taller than their flat epithelial neighbours) and split into two fragments undergoing  
82 both apical and basal rather than exclusively apical extrusion (Fig. 1C, Movie 2). Apical  
83 parts were always larger than basal parts of extruding cells. The size of basal parts  
84 released towards deep cells of the embryo varied from at least a third of the total cell  
85 volume prior to extrusion (62% of vSrc-stimulated cell extrusion events) to smaller basal  
86 vesicles (38% extrusion events; data collected from 7 movies, 19 extrusions). Since  
87 apoptosis could result in cell fragmentation<sup>17</sup>, we investigated whether transformed cells  
88 died prior to becoming extruded. vSrc cells were found to be negative for cleaved-  
89 Caspase-3 prior and following extrusion (Fig. S2A). In contrast, EVL cells expressing death  
90 associated kinase 1 (DAPK1) died prior to becoming basally extruded (Fig. S2B).  
91 Moreover, inhibiting apoptosis by expressing the anti-apoptotic protein XIAP<sup>18</sup> alongside  
92 vSrc, did not affect cell extrusion (Fig. S2C), although following extrusion, a larger apical  
93 fraction of vSrc-transformed cells eventually died, most likely via anoikis (Fig. 1C, Movie  
94 2). Therefore, we concluded that vSrc-mediated extrusion was not due to cell death.

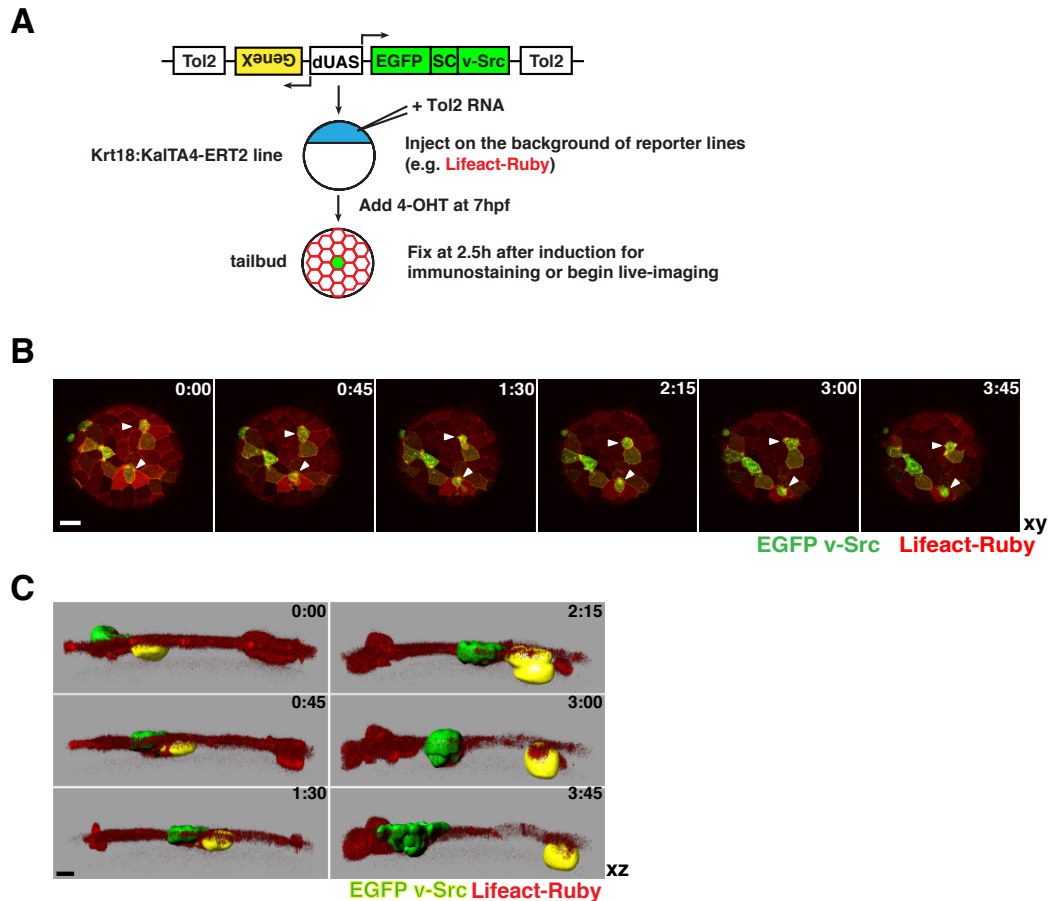

95  
 96 **Fig.1. vSrc-transformed cells become apicobasally extruded from the EVL layer of the zebrafish**  
 97 **embryo. (A)** Experimental design. Fish embryos obtained from a transgenic line expressing tamoxifen-  
 98 inducible Gal4 specifically in the EVL (Krt18:KaITa4-ERT2) are injected at one cell stage with constructs  
 99 encoding oncogenes and effectors/markers under the control of the bi-directional UAS, dUAS<sup>10</sup>. At 50-70%  
 100 epiboly, embryos are treated with tamoxifen to induce oncogene expression. At tailbud (2-3 hours from  
 101 induction, 10 hours post fertilization), embryos are fixed for quantification or mounted in agarose for live-  
 102 imaging. **(B)** Time-lapse imaging of vSrc cell extrusion from the EVL of the zebrafish embryo. Transgenic  
 103 embryos obtained from a line expressing an RFP-actin marker (red) specifically in the EVL (Krt18:Lifeact-  
 104 Ruby) line crossed with the Krt18:KaITa4-ERT2 line were injected with the UAS:EGFP-vSrc construct  
 105 (green). Movies were taken over 4 hours. Frames were extracted from a representative movie at indicated  
 106 times from the tailbud stage (t=0). White arrowheads indicate cells that become extruded. Scale bar, 50  $\mu$ m.  
 107 **(C)** Segmented time-lapse images of vSrc cell extrusion. The surface function was used to segment GFP-  
 108 positive vSrc cells over time using the Imaris software. In this cross section of the embryo (xz view), a cell is  
 109 undergoing an apicobasal split (apical part extruding outside of the embryo is marked with green shading  
 110 and the basal part extruding towards the deep cells with yellow shading). Scale bar, 10  $\mu$ m.

112 **vSrc aberrantly regulates cytokinetic machinery during extrusion.** To investigate how  
 113 vSrc cells produced apical and basal parts during extrusion, we further analysed their  
 114 properties. Live imaging revealed that proliferation rates of vSrc cells within the EVL were  
 115 significantly lower than control EVL cells expressing GFP only (Fig. 2A), likely because  
 116 transformed cells were undergoing extrusion rather than mitosis (Fig. 2B). We then  
 117 speculated that extruding vSrc cell used a contractile Actomyosin ring, such as the one  
 118 assembled during cytokinesis, for this separation. Visualising Actin and Myosin in vSrc-  
 119 mediated extrusion was inconclusive, as both proteins are constitutively present at the cell  
 120 cortex of epithelial cells accumulating junctionally in ring-like structures coupled to  
 121 adherens junctions (AJs)<sup>19</sup> (see Life-actin-RFP in Fig. 1B). To visualise a contractile

122 Actomyosin ring, we focussed on Anillin, a scaffolding protein required for the assembly of  
123 the cytokinetic ring<sup>20</sup>. During cytokinesis, Anillin is recruited to the mitotic plane through  
124 active RhoA, which is localised there by the negative and positive signals from the mitotic  
125 spindle<sup>21-24</sup>. Anillin in turn recruits Myosin and Actin, orchestrating the assembly of a  
126 contractile ring<sup>20</sup>. Following constriction, Anillin localises to the midbody, and to the  
127 nucleus in the interphase<sup>25</sup>. When imaged in normal EVL cells, Anillin-GFP behaved as  
128 described<sup>20,25,26</sup> (Fig. S3A, Movie 3). However, in vSrc-expressing cells Anillin appeared to  
129 be recruited initially to junctional foci in the lateral region and eventually to a forming  
130 junctional ring, in addition to its nuclear localisation (Fig. 2C, Movie 4). This ring constricted  
131 during vSrc cell extrusion and in the moment of apicobasal separation resembled the  
132 midbody, which was apparently inherited by the apical part of the extruding cell (Fig. 2C).  
133 Importantly, the junctional localisation of Anillin has been reported in some tissue culture  
134 systems and in *Xenopus* embryos, where it is supposedly involved in junctional  
135 maintenance<sup>27,28</sup>. However, we did not observe junctional Anillin in normal EVL cells, with  
136 the exception of extrusion in vSrc cells and briefly in mitosis following nuclear envelope  
137 breakdown (NEB) prior to its recruitment to the mitotic plane.

138  
139 The Anillin ring in vSrc cells appeared to be contractile during extrusion, as phospho-  
140 myosin light chain (pMLC) localised to the same plane (Fig. S3B). Additionally, we have  
141 created a dominant negative form of Anillin on the basis of a previously used mutated  
142 version in *C. elegans*<sup>29</sup>, which contains the ADH and PH domains (anillin and pleckstrin  
143 homology domains with the RhoA-binding motif) but lacks the MBD (myosin-binding) and  
144 ABD (actin-binding) domains. When expressed together with vSrc, this truncated form of  
145 Anillin significantly increased the rate of failed extrusions, during which cells become taller,  
146 round up and then are reintegrated into the monolayer, in comparison to vSrc alone (Fig.  
147 2D). It is worth noting that, unlike most cultured cells<sup>30</sup>, EVL cells do not normally undergo  
148 mitotic rounding prior to mitosis (e.g. Fig S3A), therefore rounding-up indicates early  
149 stages of extrusion. Interestingly, the Anillin ring itself was initially parallel to the plane of  
150 the epithelium when a vSrc cell remained flat in the EVL. As the cell became taller and  
151 rounder during the extrusion process, the ring slowly shifted its orientation such that it was  
152 positioned more and more obliquely to the surface of the embryo towards the final moment  
153 of separation (Fig. 2E). Together, these data suggest that vSrc cells aberrantly utilise the  
154 cytokinetic machinery during extrusion.

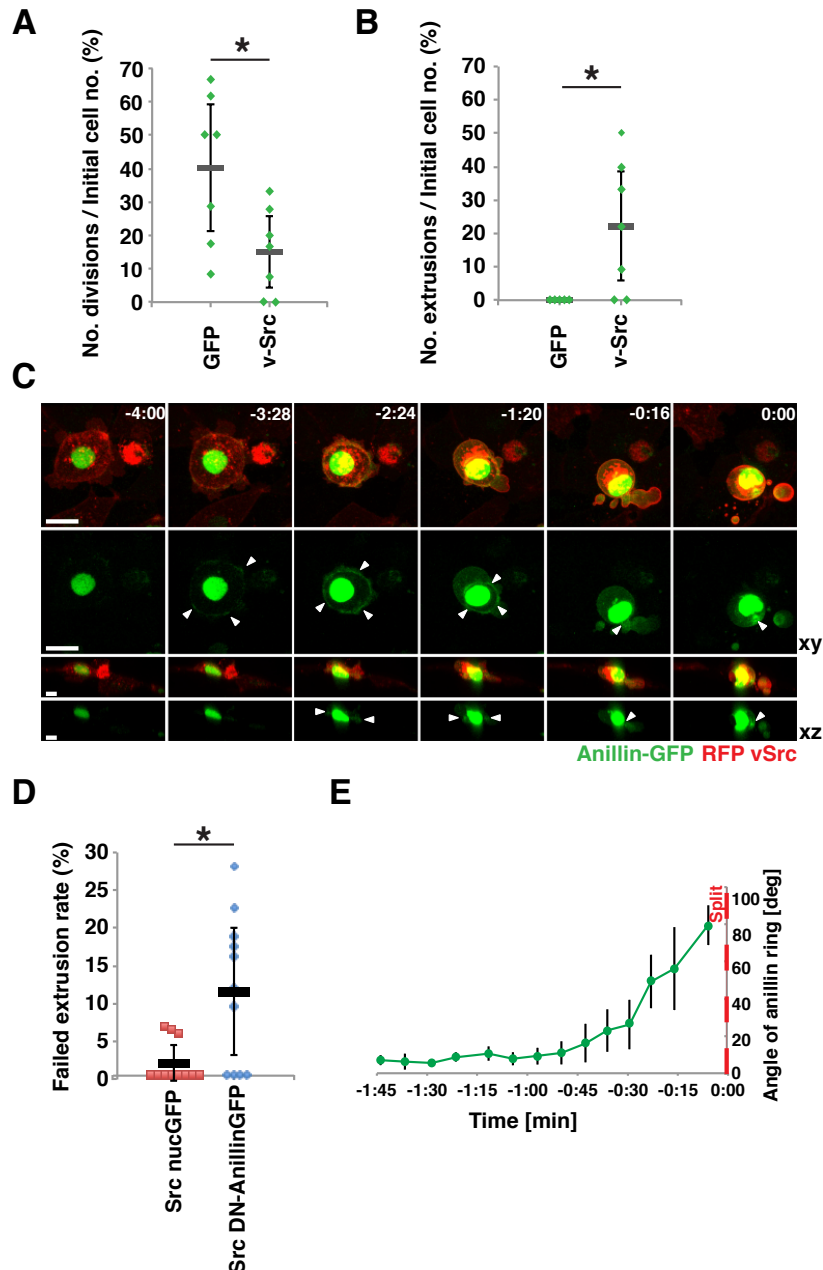

155  
 156 **Fig.2. Contractile Anillin ring is recruited to the lateral cortex of vSrc cells prior to extrusion. (A)**  
 157 Quantification of EGFP and EGFP-vSrc cell division rates based on time-lapse imaging. Division rates were  
 158 calculated as the number of divisions over 4 hours divided by the initial number of GFP-positive cells per  
 159 embryo. Each mark represents a division rate in a single embryo. 7 embryos were imaged per condition in 14  
 160 independent experiments (total number of cells:  $n_{\text{GFP}} = 121$ ,  $n_{\text{Src}} = 73$ ). \* $P < 0.05$ . **(B)** Quantification of EGFP and EGFP-vSrc cell extrusion rates based on time-lapse imaging from (A). \* $P < 0.05$ . **(C)** Time-lapse imaging  
 162 of Anillin-GFP during vSrc cell extrusion. Embryos were injected with the dUAS:myr-Cherry-vSrc;Anillin-GFP  
 163 construct. Movies were taken over 4 hours. Frames were extracted from a representative movie at indicated  
 164 times where  $t = 0$  is the moment of extrusion. White arrowheads indicate the position of the Anillin ring. Scale  
 165 bars, 25  $\mu\text{m}$  (xy) 10  $\mu\text{m}$  (xz). **(D)** Quantification of the failed extrusion rate based on time-lapse imaging.  
 166 Embryos were injected with the following constructs: dUAS:EGFP-vSrc;nucGFP and dUAS:EGFP-vSrc;DN-  
 167 Anillin. Failed extrusion rates were calculated as the number of cells that rounded up and then returned to  
 168 the monolayer without division or extrusion over 4 hours by the initial number of GFP-positive cells per  
 169 embryo. Each mark represents a division rate in a single embryo. Eleven embryos were imaged per  
 170 condition in 3 independent experiments (total number of cells:  $n_{\text{Src}} = 168$ ,  $n_{\text{Src, DNAnillin}} = 149$ ). \* $P < 0.05$ . **(E)**  
 171 Quantification of the angle between the Anillin ring and the surface of the embryo over time. Data from 4 cells



172 acquired in 3 independent experiments were then aligned to the time of extrusion,  $t = 0$ , averaged  $\pm$  s.d. and  
173 plotted.

174  
175 **vSrc-driven extrusion is predominantly cell cycle-dependent and occurs at early**  
176 **mitosis.** The ability of vSrc to modulate the cytokinetic machinery raises the question as to  
177 whether vSrc-driven extrusion requires mitotic entry. To investigate the role of cell cycle  
178 progression (Fig. 3A) in extrusion, we used fixed embryos, therefore all the following  
179 extrusion rates represent combined scores of “tall and apically extruded” cells as these  
180 remain attached to the surface of the embryo, while basally extruded parts move away and  
181 are impossible to account for. Expression of the G2/M transition inhibitors Wee1 (Fig. 3B)  
182 or constitutively active Pp2A (Fig. S4A) alongside vSrc led to strong inhibition of extrusion.  
183 Conversely, expression of a constitutively active form of the G2/M promoter Cdc25 (CA-  
184 Cdc25) resulted in an increase in extrusion (Fig. 3C). Wee1-mediated suppression of vSrc  
185 cell extrusion was rescued by constitutively active Cdk1 (Fig. 3D). Surprisingly, inhibiting  
186 G1/S transition did not have a significant effect on vSrc-driven extrusion (Fig. 3E). These  
187 results were subsequently confirmed when respective cell cycle arrests were achieved in  
188 the whole embryo with Emi1 abrogation<sup>31</sup> (Fig. S4B, C; G2/M arrest) and a combination of  
189 the chemical inhibitors aphidicolin and hydroxyurea (Fig. S4D, E; G1/S arrest). These data  
190 suggest that there are two types of vSrc cell extrusion: a cell cycle-dependent mode for  
191 which a transformed cell has to enter mitosis and a cell cycle-independent extrusion that  
192 can occur in G1.

193  
194 To establish whether extrusion is a form of misoriented mitosis, we imaged a number of  
195 mitotic markers in extruding vSrc cells. Visualisation of microtubules with Doublecortin  
196 (Dcx-GFP; Fig. S4F) and chromatin with Histone 2B (H2B-GFP; Fig. 3F) revealed that  
197 prior to extrusion the mitotic spindle is not assembled and full NEB does not occur. The  
198 nuclear volume is known to grow throughout the cell cycle and to reach its peak before  
199 mitosis<sup>32</sup>. Hence, we measured the chromatin volume in cells approaching mitosis or  
200 extrusion by determining the volume of the positive H2B-GFP signal (surface function of  
201 the Imaris software). We found that there was a set chromatin volume between 600-700  
202  $\mu\text{m}^3$  at which EVL cells expressing myr-Cherry (membrane marker) or vSrc divide, and that  
203 the same volume was reached by vSrc cells immediately before extrusion (Fig. 3G). This  
204 observation indicates that vSrc cells reach the G2 phase and become extruded in early  
205 mitosis. Remarkably, the nucleus was always inherited by the larger apical part of the cell.  
206 We did not observe full NEB in extruding cells, although increased permeability of the  
207 nuclear envelope was detected; immediately before and after extrusion a portion of H2B-  
208 GFP as well as nuclear GFP was present in the cytoplasm and inherited by the basal parts  
209 (Fig. 3F, Movies 5 and 6 and Fig. S4G). Overall, these observations indicate that most  
210 vSrc-transformed cells in the EVL become extruded in a cell cycle-dependent manner  
211 instead of completing mitosis.

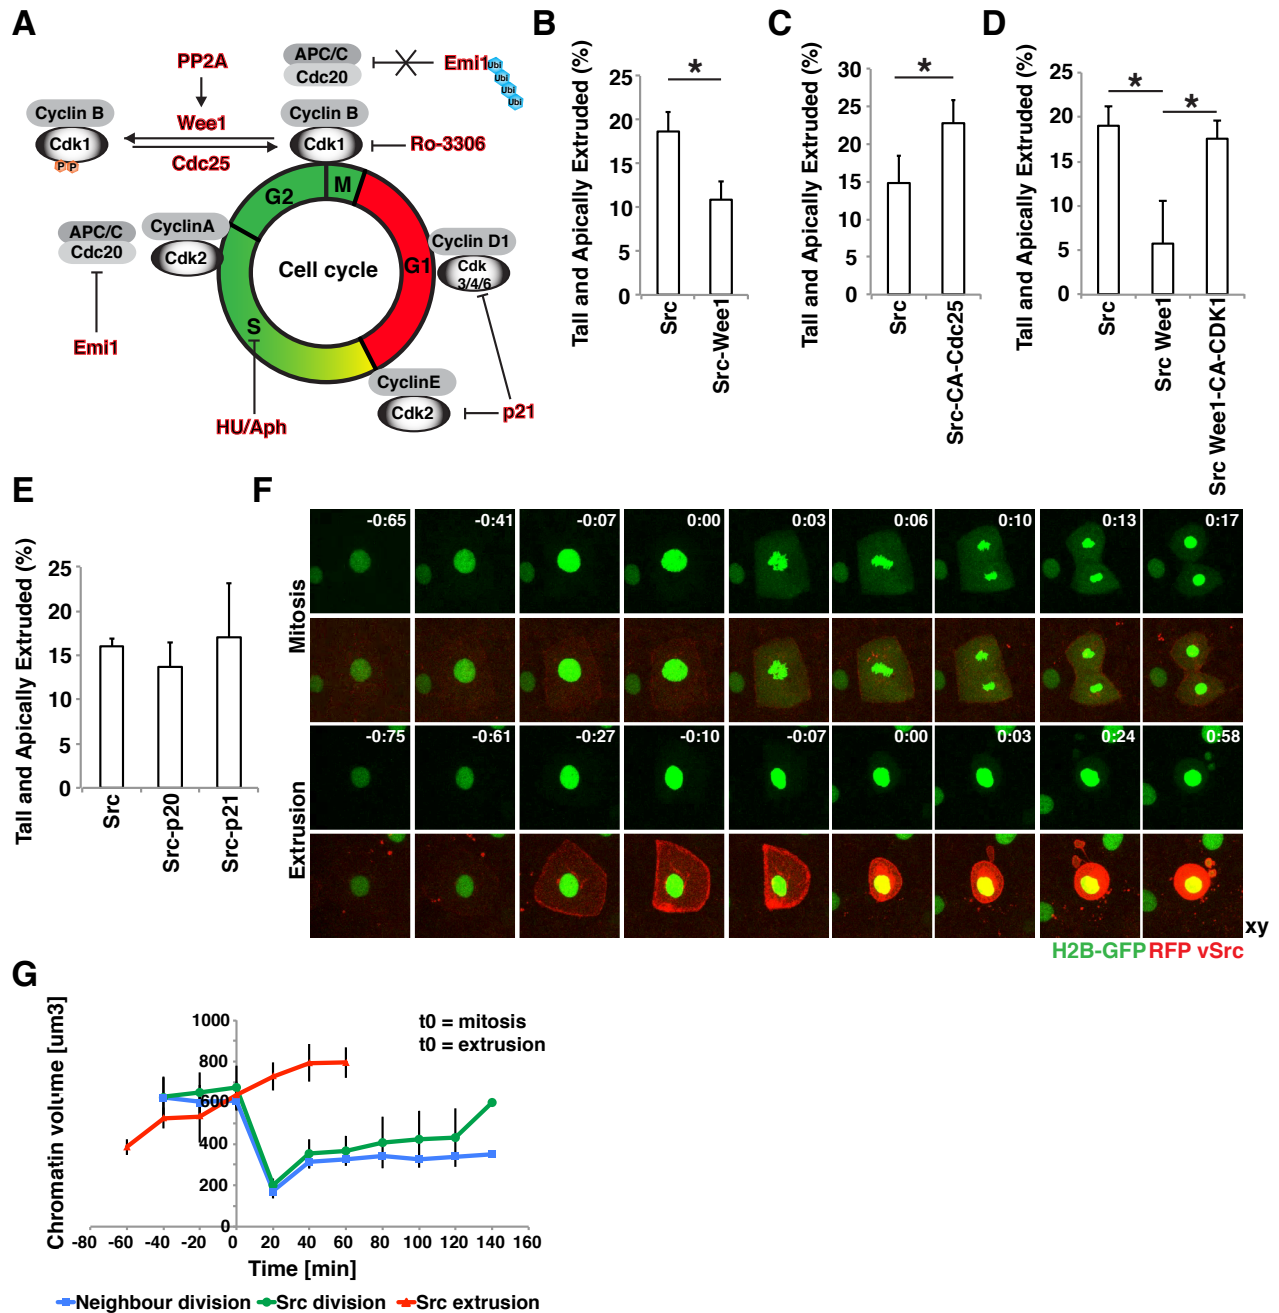

212  
 213 **Fig.3. vSrc-transformed cells extrude in early mitosis, immediately after crossing the G2/M transition**  
 214 **of the cell cycle. (A)** A schematic model of cell cycle regulation. Highlighted in red are the molecules whose  
 215 roles in cell extrusion were tested in this work. **(B)** The effect of Wee1 expression on vSrc-driven extrusion.  
 216 Embryos were injected with the following constructs: dUAS:EGFP-vSrc and dUAS:EGFP-vSrc;Wee1. Data  
 217 represent the number of tall and extruded cells divided by the total number of GFP-positive cells. Data  
 218 are mean  $\pm$  s.d. of 3 independent experiments (total number of embryos:  $n_{\text{Src}} = 21$ ;  $n_{\text{Src,Wee1}} = 27$ ). \*P < 0.05. **(C)**  
 219 The effect of constitutively active Cdc25 on vSrc-driven extrusion. Embryos were injected with the following  
 220 constructs: dUAS:EGFP-vSrc and dUAS:EGFP-vSrc;CA-Cdc25. Data are mean  $\pm$  s.d. of 3 independent  
 221 experiments (total number of embryos:  $n_{\text{Src}} = 18$ ;  $n_{\text{Src,Cdc25}} = 21$ ). \*P < 0.05. **(D)** Constitutively active Cdk1  
 222 rescues Wee1 inhibition of vSrc-driven extrusion. Embryos were coinjected with the following constructs:  
 223 dUAS:EGFP-vSrc alongside either dKrt18:myr-Cherry, dKrt18:Cherry-Wee1 or dKrt18:Cherry-Wee1;CA-  
 224 Cdk1. Data are mean  $\pm$  s.d. of 3 independent experiments (total number of embryos:  $n_{\text{Src}} = 30$ ;  $n_{\text{Src,Wee1}} = 29$ ;  
 225  $n_{\text{Src,Wee1,Cdk1}} = 33$ ). \*P < 0.05. **(E)** The effect of p20 and p21 expression on vSrc-driven extrusion.  
 226 Embryos were injected with the following constructs: dUAS:EGFP-vSrc, dUAS:EGFP-vSrc;p20 and dUAS:EGFP-  
 227 vSrc;p21. Data are mean  $\pm$  s.d. 3 independent experiments (total number of embryos:  $n_{\text{Src}} = 21$ ;  $n_{\text{Src,p20}} = 19$ ;



228  $n_{\text{Src},p21} = 11$ ). **(F)** Time-lapse imaging of H2B-GFP in mitosis (top panel) and extrusion (bottom panel).  
229 Embryos were injected with the dUAS:myr-Cherry-vSrc;H2B-GFP construct. Movies were taken over 4 hours  
230 and frames were extracted from a representative movie. T0 indicates either the beginning of mitosis  
231 (chromatin condensation) or the moment of extrusion. Scale bars, 10  $\mu\text{m}$ . **(G)** Quantification of the chromatin  
232 volume (defined as the volume that H2B-GFP signal occupies in space) measured using the surface function  
233 of Imaris. The blue line follows chromatin volume change over time in a dividing EVL cell expressing myr-  
234 Cherry, the green line – in a dividing vSrc cell, the red line – in a extruding vSrc cell.

235  
236 **Src activation results in G2/M arrest that eventually leads to extrusion.** To  
237 understand how exactly Src activation modulates cell cycle progression, we established a  
238 transgenic line expressing Cyclin B1-GFP (CcnB1-GFP) only in the EVL. Cyclin B1 forms a  
239 complex with CDK1 and allows entry into mitosis. Cyclin B1 is transcribed and stabilised in  
240 cells starting from the late S phase throughout the G2, and is rapidly degraded in  
241 mitosis<sup>33,34</sup>. Here we used it as a marker of the cell cycle phase in live imaging as none of  
242 the previously established FUCCI markers<sup>35-38</sup> for imaging of the cell cycle in living  
243 embryos worked in our hands. In the CcnB1-GFP line, the GFP signal was present in the  
244 cytoplasm (from the late S phase) and gradually increased before mitosis. Following G2/M  
245 transition CcnB1-GFP localised first to the centrosomes, then to the nucleus<sup>39,40</sup> and was  
246 finally degraded during division (Fig. 4A, Movie 7). To estimate the average length of  
247 different cell cycle phases in the EVL, we acquired movies of CcnB1-GFP transgenic  
248 embryos for the duration of 8 hours. Some of the cells that divided at the beginning of each  
249 movie divided again. For the quantification purpose, we split the cell cycle of EVL cells into  
250 3 phases on the basis of changes in the intensity and localisation of CcnB1-GFP: (1)  
251 mitosis, defined as the time from the nuclear import of Cyclin B1 until completed  
252 cytokinesis, (2) G1/S phase, defined as the time from completed cytokinesis until the GFP  
253 signal reappeared in the cytoplasm, and (3) S/G2, defined as the time of the GFP signal  
254 present in the cytoplasm until its nuclear import. The average length of the cell cycle in the  
255 EVL was 8 h 25 min, with mitosis lasting 48 min and very variable G1/S and S/G2 lengths  
256 of on average 3 h 14 min and about 4 h 23 min, respectively (Fig. 4C).

257  
258 To characterise how vSrc affects cell cycle parameters in the EVL, CcnB1-GFP transgenic  
259 embryos from the same batches were injected with constructs either carrying myr-Cherry-  
260 vSrc or myr-Cherry as a control. Each embryo pair (transformed and non-transformed) was  
261 then imaged and analysed side by side to avoid bias (representative pair: Fig. 4A, B,  
262 Movies 7 and 8). As a certain amount of the active Cyclin B1/CDK1 complex is required to  
263 trigger mitosis<sup>34</sup>, we measured the average intensity of the GFP signal in pairs of cells  
264 prior to division or extrusion. Firstly, 28 out of 31 extruded vSrc cells in CcnB1-GFP  
265 transgenic embryos had a high GFP signal, indicating that extrusion occurred in the later  
266 phases of the cell cycle (Fig. 4B). The average GFP intensity in vSrc cells about to be  
267 extruded was nearly doubled in comparison to equivalent control cells before division (Fig.  
268 4D). Three out of 31 vSrc cells were extruded soon after dividing within the EVL in the G1  
269 phase of the cell cycle, with very low average GFP intensity (Fig. 4D). The average volume  
270 of vSrc cells immediately before extrusion was significantly smaller than that of an average  
271 EVL cell before division, but this relatively small decrease was not sufficient to explain the  
272 average GFP intensity increase observed in vSrc cells (Fig. 4E). Moreover, the increased  
273 GFP signal could already be observed in vSrc cells remaining in the epithelium at the start  
274 of imaging ( $t = 0$ ) as compared to control cells (Fig. 4F). Finally, when assessing how long  
275 vSrc cells remain in the S/G2 phase, we realised that cells, which eventually became  
276 extruded, were very rarely negative for the cytoplasmic GFP signal (only in 2 out of 28

277 cases), making it impossible for us to measure the length of the S/G2 phase prior to  
 278 extrusion. Together, these data indicate that vSrc cells before extrusion remain longer in  
 279 the S/G2 phase and accumulate more Cyclin B1 than normal EVL cells prior to division.  
 280 This suggests that G2/M arrest presumably occurs prior to vSrc cell extrusion.  
 281

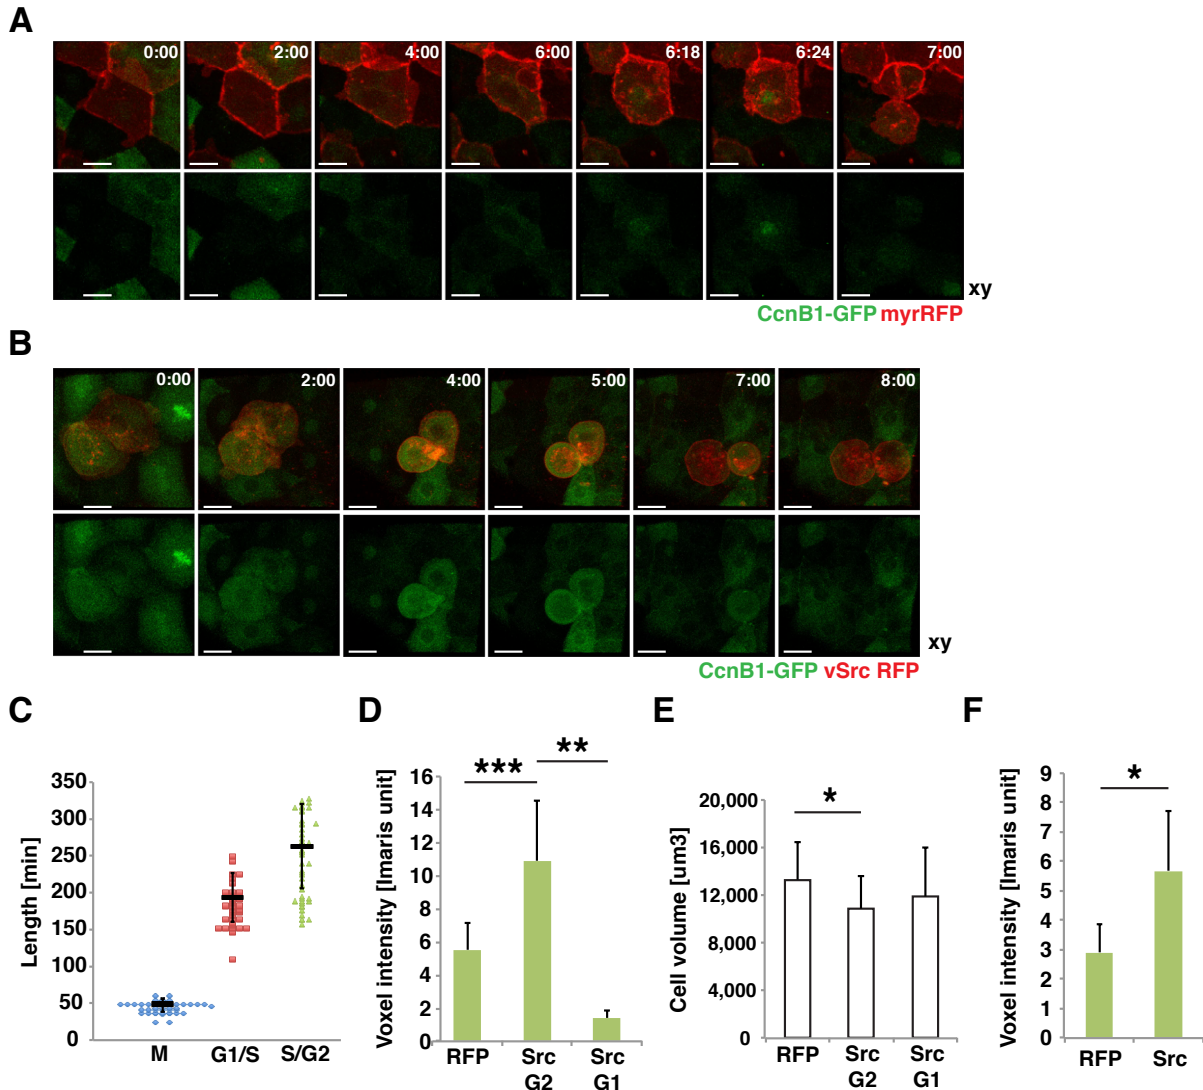

282  
 283 **Fig.4. vSrc tyrosine kinase modulates the activities of major cell cycle players in the G2 phase prior to extrusion.** (A,B) Time-lapse imaging of CyclinB1-GFP in cell extrusion. Transgenic embryos obtained  
 284 from a line expressing a cell cycle progression marker specifically in the EVL (Krt18:CcnB1-GFP) crossed  
 285 with the Krt18:KalTA4-ERT2 line were injected with the construct UAS:myr-Cherry (A) or UAS:myr-Cherry-  
 286 vSrc (B). Movies were taken over 8 hours. Frames were extracted from a representative movie at indicated  
 287 times from the tailbud stage. Scale bars, 10  $\mu$ m. (C) Length of different cell cycle phases of the EVL cells  
 288 from the CcnB1-GFP line. The cell cycle phases are defined as follows; M is the time from the nuclear import  
 289 of CcnB1-GFP until completed cytokinesis; G1/S is the time from completed cytokinesis until the GFP signal  
 290 returns to the cytoplasm; S/G2/M is the time of the GFP signal present in the cytoplasm until mitosis. Each  
 291 mark represents a single cell. Data collected from 5 movies in 3 independent experiments. (D) Mean voxel  
 292 intensity  $\pm$  s.d. of the CcnB1-GFP signal in single cells immediately before extrusion (myr-Cherry-vSrc) or  
 293 division (myr-Cherry). Data collected from 31 extruded vSrc cells and 31 dividing myr-Cherry cells in 12  
 294 movies per condition from 5 independent experiments. \*\*\* $P = 2.1 \times 10^{-7}$ , \*\* $P = 8.4 \times 10^{-4}$ . (E) Cell volume  
 295 analysis before division and extrusion. Average volume  $\pm$  s.d. of the cells used for CcnB1-GFP signal  
 296 quantification immediately before extrusion or division (Fig. 4D). \* $P < 0.05$ . (F) Mean voxel intensity  $\pm$  s.d. of  
 297 the green channel (CcnB1-GFP) in myr-Cherry cells and myr-Cherry-vSrc cells at time 0 of a time-lapse from  
 298

299 cells remaining in the epithelium. Data collected from 11 embryos per condition in 5 independent  
300 experiments. \*P = 0.005.

301

302 **Src-transformed mammalian cultured cells become extruded in cell cycle-**  
303 **dependent and cell cycle-independent fashions.** To elucidate whether coordination of  
304 oncogenic extrusion and the cell cycle was a general phenomenon present also in  
305 mammals, we took advantage of the previously established tissue culture system utilising  
306 Madin-Darby Canine kidney (MDCK) mammalian cells<sup>8</sup>. Firstly, we treated mixed cultures  
307 of Src-expressing and wild type MDCK cells (mixing ratio 1:50) with cell cycle inhibitors: a  
308 CDK1 inhibitor Ro-3306 (G2/M arrest; Fig. S5A, B) and hydroxyurea (early S phase arrest;  
309 Fig. S5C). Consistent with the observation in the zebrafish EVL, we found that Src cell  
310 extrusion was significantly inhibited only by Ro-3306 (Fig. 5A). Further, we exploited the  
311 reliability of cell cycle markers for live imaging in mammalian cells and established a new  
312 line harbouring both active Src and the cell cycle monitor marker FUCCI<sup>37</sup>, which displays  
313 nuclear staining depending on the phase of the cell cycle: red in G1 and green in S/G2.  
314 We used this line for live imaging of Src cell extrusion (Fig. 5B) and found that 50% of Src-  
315 transformed cells in the mammalian system became extruded and subsequently their  
316 nucleus turned red (transition to G1 after extrusion; Fig. 5C). In some cases extrusion and  
317 division happened simultaneously, in others extrusion took place instead of mitosis (Fig.  
318 5B). However, 30% of Src-transformed MDCK cells remained red throughout extrusion  
319 (stayed in G1 before and after extrusion, Fig. 5C), implying a cell cycle-independent mode  
320 of extrusion, similar to the one hypothesised in the embryo arrested in the G1 phase of the  
321 cell cycle. These data indicate that both the zebrafish embryo and mammalian cells utilise  
322 the two modes of oncogenic Src-driven extrusion, of which the more frequent one requires  
323 coordination with the cell cycle.

324

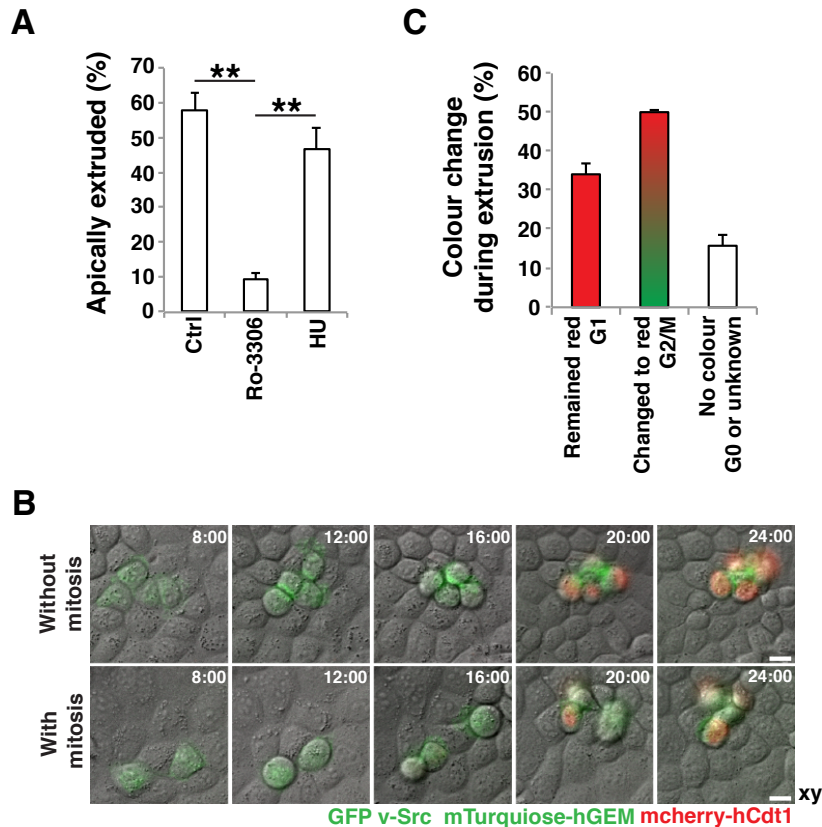

325  
 326 **Fig.5. Src-transformed MDCK cells become extruded predominantly either during or instead of**  
 327 **mitosis. (A)** The effect of inhibition of the G2/M transition or G1/S transition on extrusion of MDCK pTR-  
 328 cSrc-Y527F from a monolayer of normal MDCK cells. Inhibitors 2 mM hydroxyurea or 10  $\mu$ M Ro-3306 were  
 329 added with a 9-hour delay after the induction of Src expression. At 24 hours from Src induction cells were  
 330 fixed, stained with phalloidin and imaged. Data are mean  $\pm$  s.d. 3 independent experiments (total number of  
 331 cells:  $n_{Ctrl}$  = 155;  $n_{HU}$  = 153;  $n_{Ro3306}$  = 152). \*\* $P$  < 0.005. **(B)** Time-lapse imaging over 24 hours of extrusion of  
 332 MDCK stably expressing both pTR-cSrc-Y527F-GFP and FUCCI. GFP-CAAX labels Src cells (green  
 333 membrane) that express Cherry-hCdt1 in G1 phase (red nuclei) or mTurquoise-hGEM in S/G2/M phases  
 334 (green nuclei). **(C)** Quantification of the nuclear colour change in MDCK pTR-cSrc-Y527F-GFP/FUCCI cells  
 335 during extrusion based on live imaging. Data are mean  $\pm$  s.d. of 2 independent experiments (total number of  
 336 extruded cells:  $n$  = 63).

337  
 338 **vSrc modulates cell cycle regulators Cdk1 and Pp2a.** To investigate how vSrc  
 339 modulates the G2/M transition, we searched for Src-phosphorylated proteins in the  
 340 database ([www.phosphositeplus.org](http://www.phosphositeplus.org)), and speculated that two good candidates for  
 341 mediating this process are CDK1 and PP2A. PP2A is a phosphatase that antagonises the  
 342 CDK1-CyclinB1 complex throughout the cell cycle, but has to be inactivated in order for a  
 343 cell to enter mitosis<sup>41</sup>. Src phosphorylates PP2A on an inhibitory site tyrosine 307<sup>42,43</sup>,  
 344 thereby promoting mitotic entry. As shown earlier, a mutant form of Pp2A, which lacks this  
 345 phosphorylation, leads to an inhibition of vSrc-induced extrusion (Fig. S4A). Much less well  
 346 documented is the action of the Src kinase on CDK1. The most probable Src-  
 347 phosphorylation site within CDK1 is Tyrosine 15 (Y15), one of the two inhibitory sites that  
 348 need to be dephosphorylated for activation of the mitotic complex CDK1-CyclinB1<sup>44</sup> (Fig.  
 349 6A). It has been demonstrated that Src phosphorylates a CDK1 peptide surrounding Y15  
 350 *in vitro*, since this peptide has been used as a positive control for Src phosphorylation<sup>43</sup>.  
 351 Therefore, we hypothesised that simultaneous phosphorylation of Pp2A and Cdk1 by vSrc,  
 352 the former promoting, the later inhibiting G2/M transition, could be responsible for the



353 prolonged G2 phase of vSrc cells. Hence, we sought to test that Cdk1 is a target of vSrc in  
354 our system.

355  
356 Since an anti-CDK1-Y15 antibody did not recognise zebrafish Cdk1-Y15 at endogenous  
357 levels, we created the authentic CDK1 peptide<sup>43</sup> tagged with both RFP and an HA epitope.  
358 This peptide was phosphorylated prior to extrusion when expressed together with GFP-  
359 vSrc, but not with GFP-CAAX (Fig. 6B). To consolidate this observation, we turned to the  
360 MDCK tissue culture system. Normal MDCK cells alone, Src-expressing MDCK cells alone  
361 and mixed cultures were analysed by western blotting with the anti-CDK1-Y15 antibody. A  
362 low level of phospho-CDK1 was observed in normal MDCK cells, and the level was  
363 increased after incubation with hydroxyurea (G1/S arrest; Fig. 6C, D). The phospho-CDK1  
364 level was much higher in Src-expressing cells and was moderate in the mixed cultures,  
365 suggesting that Src has the ability to directly or indirectly promote CDK1 phosphorylation,  
366 thereby inhibiting its activity (Fig. 6C, D).

367  
368 A state in which cell cycle progression is both promoted and inhibited has been studied  
369 before and may result in “mitotic collapse”<sup>45</sup>. “Mitotic collapse” occurs after entry to mitosis,  
370 when CDK1 activation is not sustained at a high enough level for mitosis to proceed. This  
371 leads to dephosphorylation of mitotic substrates without degradation of Cyclin B1 and  
372 eventually results in cell death. Since Src activation both promotes and inhibits cell cycle  
373 progression, we wondered if cell extrusion could be a result of “mitotic collapse”. To  
374 recapitulate this state in the EVL without vSrc, we simultaneously expressed two G2/M  
375 modulators: the inhibitor kinase Wee1 and the active phosphatase CA-Cdc25 both directly  
376 regulating CDK1. Although we managed to block EVL cells at the G2/M transition (as  
377 confirmed by nuclear localisation of Cyclin B1 in Fig. S6A), no extrusion was observed at  
378 least over 4 hours. Inflicting other mitotic defects in the EVL such as triggering monopolar  
379 spindles, which can be induced by blocking Kif11 (Eg5) with an STLC inhibitor  
380 treatment<sup>46,47</sup>, also failed to cause extrusion (Fig. S6B, C). We concluded that EVL cells  
381 have the ability to cope with mitotic defects and delays without initiating death or extrusion  
382 of the “faulty cells” at least within the duration of our experimentations.

383  
384 Overall, Src activation leads to a prolonged arrest in the G2 phase of the cell cycle due to  
385 modulation of cell cycle regulators Cdk1 and Pp2a. However, this modulation when  
386 mimicked in the EVL without vSrc, is insufficient to result in extrusion, suggesting that  
387 other vSrc effectors must be involved.



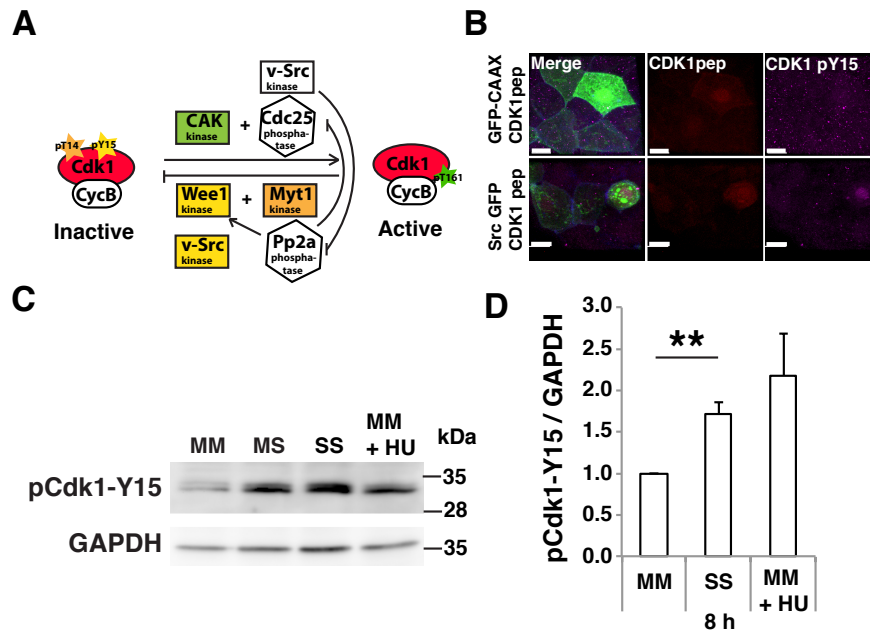

**Fig. 6. vSrc modulates cell cycle regulators CDK1 and Pp2a.** (A) A schematic model of Src interference with cell cycle regulation. (B) Immunofluorescence images of CDK1 pY15 (purple) in the EVL cells expressing the mKO2-CDK1-pep (red) alongside EGFP or EGFP-vSrc (green). Scale bar, 10  $\mu\text{m}$ . (C) The effect on phosphorylation of CDK1 after 8 hours from Src activation in MDCK cells. MM – MDCK cells alone, SS – Src cells alone, MS – cultures mixed 1:1, MM+HU – MDCK cells treated with 2mM hydroxyurea (HU). (D) Quantification of the mean normalised signal  $\pm$  s.d. in western blotting with the anti-CDK1-pY15 antibody after 8 hours from Src activation in MDCK cells from 3 independent experiments.

**vSrc modifies adherens junctions to recruit Anillin.** At this point, the means by which vSrc hijacked the cytokinetic machinery were still unclear. In a dividing cell positioning of the mitotic plane is determined by the mitotic spindle<sup>21,23</sup>; however, the spindle and its cues for cytokinetic ring assembly were absent in a vSrc cell undergoing extrusion (Fig. S4F). This raised the possibility that the Anillin ring may be involved in extrusion via junctional constriction. Since RhoA activation promotes Anillin recruitment to the mitotic plane<sup>20,22,24</sup> and modulates junctional integrity<sup>48</sup>, we investigated the effects of constitutively active and dominant negative RhoA on extrusion. Surprisingly, expression of either of these forms suppressed vSrc-mediated increase in height (rounding-up), but not extrusion itself (Fig. 7A). Moreover, RhoA activation without vSrc did not trigger extrusion (Fig. S7A). These results imply that focal RhoA activation at the junctions is necessary for the assembly of the contractile Anillin ring, but that widespread activation or inactivation of RhoA presumably inhibits this process.

What mediates coupling of the cytokinetic machinery with the junctions? A recent study on the regulation of cytokinetic ring assembly identified p120-catenin, a component of the AJs, as a scaffold that restricts RhoA activation zone to the constricting ring<sup>49</sup>. This prompted us to hypothesise that p120-catenin, a well-known target of the Src kinase<sup>50</sup>, could be the factor that delocalises Anillin to the junctions in the absence of cues coming from the mitotic spindle. To test this hypothesis, we attempted to modulate the p120-catenin function in extruding vSrc cells. Two tyrosine residues Y217 and Y228 of p120-catenin when phosphorylated by Src are known to promote the interaction between the Src kinase and RhoA<sup>51</sup>. Therefore, we created a phosphomimetic mutant versions of p120-

420 catenin in which these tyrosine residues were replaced with phenylalanines (FF) to mimic  
421 lack of phosphorylation (Fig. 7B). Interestingly, expression of the p120-catenin FF mutant  
422 together with vSrc already significantly attenuated extrusion, presumably acting as a  
423 dominant negative form in this context (Fig. 7C). This suggests that vSrc modulates  
424 adherens junctions to couple with the cytokinetic machinery.

425  
426 We then sought if modified p120-catenin could link the cytokinetic ring to the junctions in a  
427 cell cycle-dependent manner, mimicking vSrc-like activity during cell extrusion. Expression  
428 of the p120-catenin EE mutant, in which the Src-dependent phosphorylation sites are  
429 replaced with glutamic acids to mimic a permanent state of phosphorylation, with  
430 concomitant expression of the Wee1 kinase and CA-Cdc25 phosphatase resulted in a  
431 G2/M arrest phenotype in normal EVL. In the presence of these three factors, we indeed  
432 observed Anillin-GFP recruited to the junctions. In some cases, the cells expressing these  
433 factors underwent basal extrusion accompanied by immediate cell death (Fig. 7D, Movie  
434 9). Importantly, without the EE mutant of p120-catenin, expression of Wee1 and CA-Cdc25  
435 was not sufficient to recruit Anillin-GFP to the junctions in cells arrested at the G2/M  
436 transition (Fig. 7E). In rare cases of basal extrusion due to protein overexpression in these  
437 embryos, Anillin was not recruited to the junctions and this type of extrusion appeared to  
438 be Anillin-ring independent (Fig. S7B). Finally, when p120-mutant-FF, instead of p120-  
439 mutant-EE, was expressed alongside Anillin-GFP in cells arrested at the G2/M transition,  
440 Anillin could not be stably recruited to the junctions, form a ring or facilitate cell extrusion  
441 (Fig. 7F). This last observation proved that phosphorylation of p120-catenin by vSrc on  
442 residues Y217 and Y228 was indeed responsible for the recruitment of Anillin to the  
443 junctions and drove the apicobasal split of vSrc cell during extrusion.

444  
445 Collectively, Src activation in the EVL leads to altered cell cycle progression, assembly of a  
446 contractile ring initially parallel to the surface of the embryo through AJs in the prolonged  
447 G2 phase of the cell cycle and extrusion via constriction of this ring in early mitosis. During  
448 extrusion, the misoriented ring constricts and separates the basal from the apical part of  
449 the cell releasing both from the epithelium.

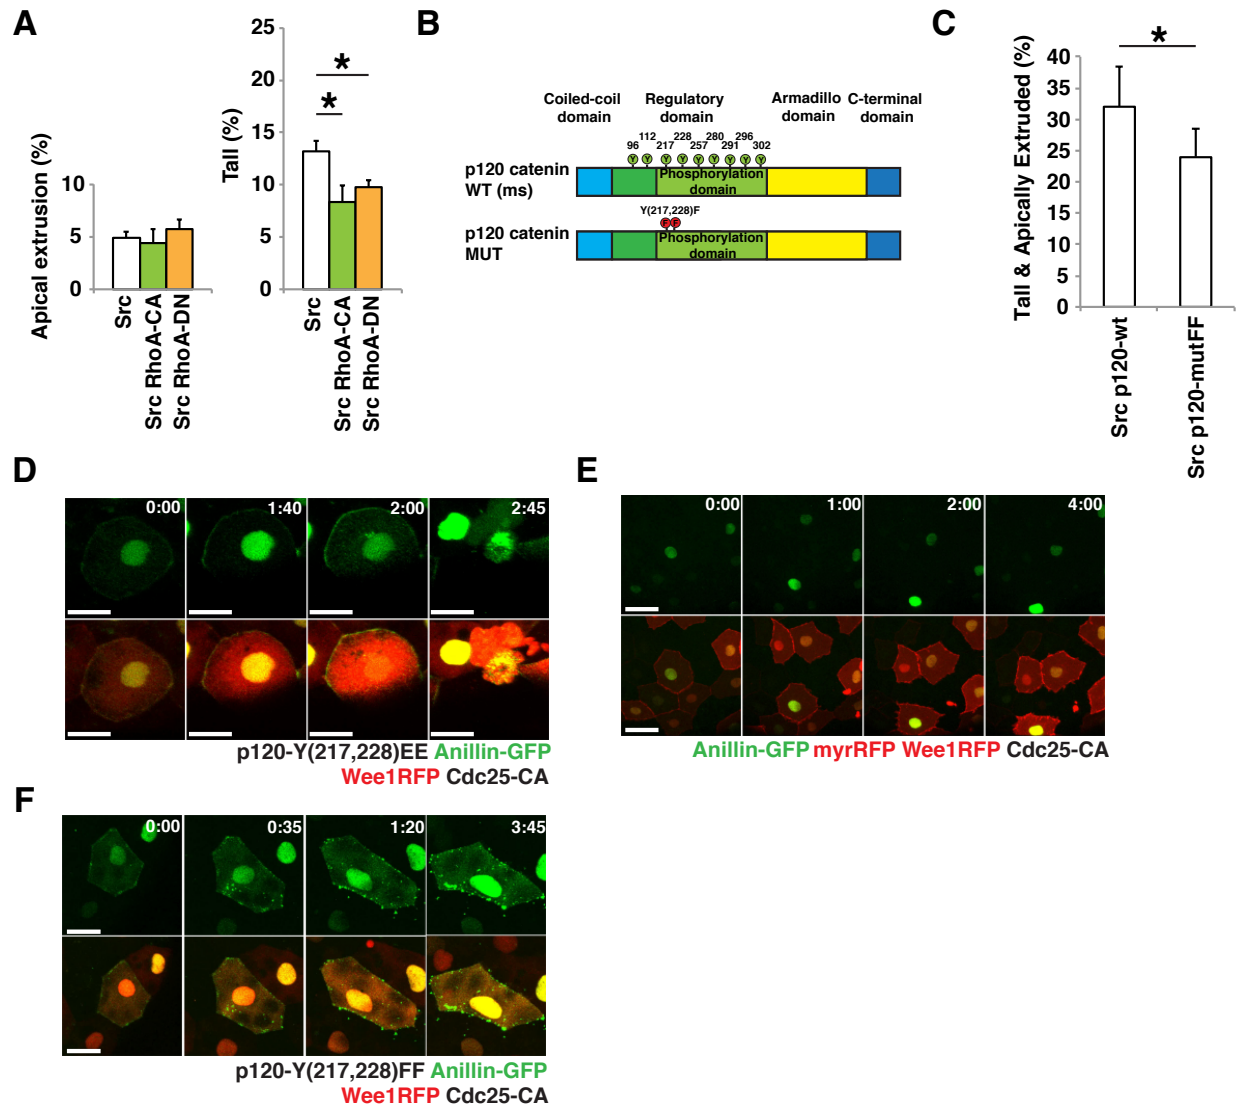

450  
 451 **Fig.7. Src-phosphorylated p120-catenin recruits Anillin to the junctions allowing formation of a**  
 452 **contractile ring. (A)** The effect of constitutively active RhoA and dominant negative RhoA expression on  
 453 vSrc-driven extrusion. Embryos were injected with the following constructs: dUAS:EGFP-vSrc, dUAS:EGFP-  
 454 vSrc;CA-RhoA or dUAS:EGFP-vSrc;DN-RhoA. Data are presented in two graphs displaying cells “Apically  
 455 extruded” (outside of the embryo) and “Tall” (remaining in the monolayer but taller and rounder than  
 456 neighbours). Data are mean  $\pm$  s.d. 3 independent experiments (total number of embryos:  $n_{\text{Src}} = 35$ ;  $n_{\text{Src,CA-RhoA}}$   
 457  $= 38$ ;  $n_{\text{Src, DN-RhoA}} = 36$ ). \* $P < 0.05$ . **(B)** A schematic model of the domain composition of p120-catenin.  
 458 Highlighted in green are phosphorylation sites regulated by the Src kinase (from: PhosphoSitePlus  
 459 database). In the bottom panel, a design of p120-catenin mutant with two sites, which regulate the interaction  
 460 between p120-catenin and RhoA<sup>51</sup>. These Src-dependent phosphorylation sites are mutated from Y to F  
 461 (p120-mutFF). **(C)** The effect of phospho-mimetic p120-mutFF on vSrc-driven extrusion. Embryos were  
 462 injected with the following constructs: dUAS:EGFP-vSrc;p120-wt or dUAS:EGFP-vSrc;p120-mutFF. Data are  
 463 mean  $\pm$  s.d. 3 independent experiments (total number of embryos:  $n_{\text{Src}} = 34$ ;  $n_{\text{Src,CA-RhoA}} = 42$ ). \* $P < 0.05$ . **(D)**  
 464 Time-lapse imaging of the effect of phospho-mimetic p120-mutEE on the localisation of Anillin-GFP in cells  
 465 arrested at the G2/M transition. Embryos were injected with a combination of the following constructs:  
 466 dUAS:Cherry-Wee1;CA-Cdc25 and dUAS:p120-mutEE;AnillinGFP. Movies were taken over 4 hours. Frames  
 467 were extracted from a representative movie at indicated times from the tailbud stage. Scale bars, 25  $\mu\text{m}$ . **(E)**  
 468 Time-lapse imaging of Anillin-GFP localisation in cells arrested at the G2/M transition. Embryos were injected  
 469 with a combination of the following constructs: dUAS:Cherry-Wee1;CA-Cdc25 and dUAS:myr-  
 470 Cherry;AnillinGFP. Movies were taken over 4 hours. Frames were extracted from a representative movie at  
 471 indicated times from the tailbud stage. Scale bars, 50  $\mu\text{m}$ . **(F)** Time-lapse imaging of the effect of p120-  
 472 mutFF on the localisation of Anillin-GFP in cells arrested at the G2/M transition. Embryos were injected with

473 a combination of the following constructs: dUAS:Cherry-Wee1;CA-Cdc25 and dUAS:p120-mutFF;AnillinGFP.  
474 Movies were taken over 4 hours. Frames were extracted from a representative movie at indicated times from  
475 the tailbud stage. Scale bars, 25  $\mu$ m.

476

477 **vSrc promotes apical polarity shift and survival to enable extrusion.** So far, we have  
478 identified crucial cellular process and property that need to be modified by the vSrc kinase  
479 for extrusion to occur: the cell cycle and AJs. However, when we tried to mimic vSrc-like  
480 changes in cells without the active kinase, extrusion occurred only occasionally, was basal  
481 instead of apical, and was associated with cell death (Fig. 7D). Hence, we wondered  
482 whether modulating cell polarity downstream of Src activation could lead to a change in  
483 directionality of extrusion. It has been shown that Src fine-tunes the activity of the small  
484 GTPase Cdc42 both directly and indirectly downstream of EGF stimulation<sup>52</sup>. Cdc42 has  
485 pivotal roles in establishing apicobasal polarity in all eukaryotic cells<sup>53,54</sup> and in regulating  
486 the apical polarity complex aPKC-Par3-Par6 in a manner conserved among different  
487 species<sup>55-57</sup>. Therefore, Cdc42 could be a good candidate to link Src with polarity. When a  
488 dominant negative form of a downstream mediator of Cdc42, atypical protein kinase C  
489 (DN-aPKC), which contains only the N-terminal regulatory domain targeted to the  
490 membrane<sup>58</sup>, was expressed together with vSrc, it inhibited vSrc-driven extrusion (Fig. 8A).  
491 This suggests a role for the modulation of apicobasal polarity in vSrc-mediated extrusion.

492

493 Apart from modulating the cell cycle, AJs and cell polarity, we speculated that Src  
494 activation involves promoting cell survival, as demonstrated previously<sup>59</sup>. To reconstitute  
495 vSrc-like cell extrusion, finally we expressed all the components: the cell cycle modulators  
496 Wee1 and CA-Cdc25, the AJs' component recruiting Anillin p120-mutant-EE, the polarity  
497 modulator constitutively active membrane-bound aPKC (myr-aPKC) and the pro-survival  
498 protein XIAP together in EVL cells. Indeed, combining all the components that mimic Src  
499 activation in the EVL resulted in vSrc-like extrusion: apicobasal split, where extruded cells  
500 did not die immediately (Fig. 8B, C, Movies 10 and 11). Thus, we managed to pinpoint four  
501 effector pathways downstream of vSrc that coordinate apicobasal extrusion: cell cycle via  
502 modulating Cdk1 and Pp2a, AJs via p120 catenin, apicobasal polarity and cell survival  
503 (Fig. 8D, S8C).

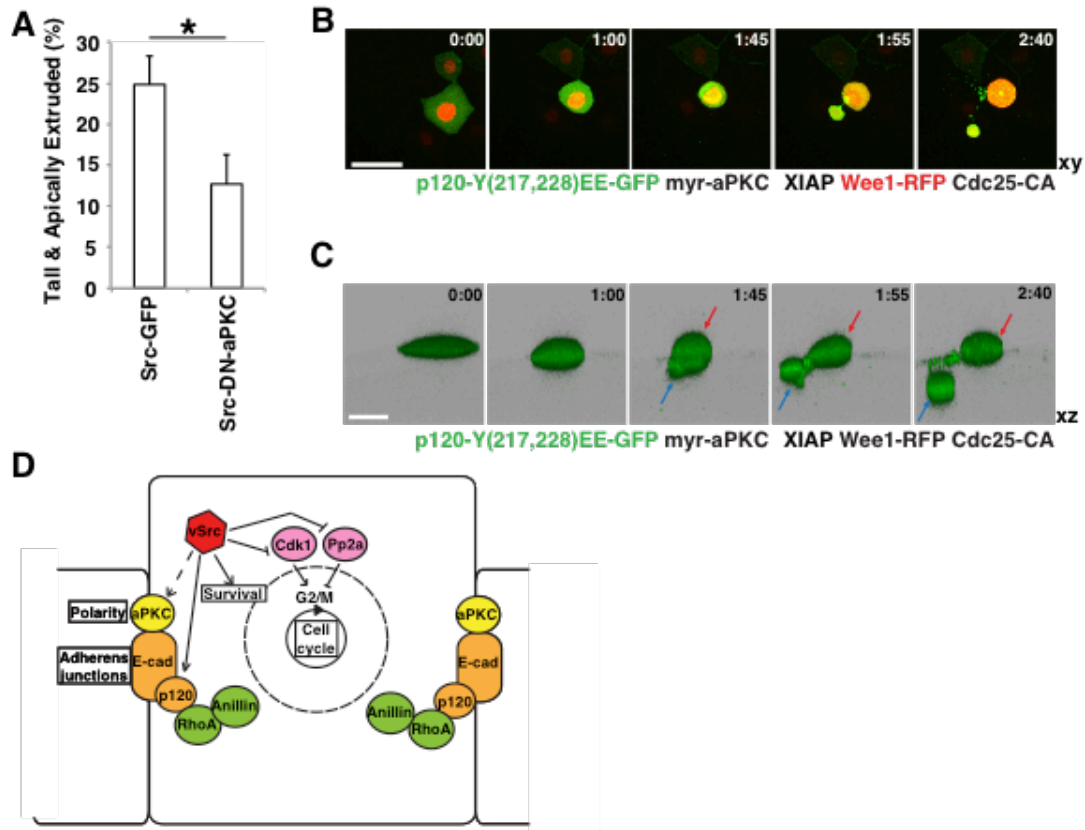

**Fig.8. vSrc-like extrusion can be reproduced by modulating the cell cycle, junctions and polarity in a vSrc-like manner.** (A) The effect of dominant negative aPKC on vSrc-driven extrusion. Embryos were injected with the following constructs: dUAS:EGFP-vSrc and dUAS:EGFP-vSrc;DN-aPKC. Data are mean  $\pm$  s.d. 3 independent experiments (total number of embryos:  $n_{\text{Src}} = 31$ ;  $n_{\text{Src, DN-aPKC}} = 31$ ). \* $P < 0.05$ . (B) Time-lapse imaging of vSrc-like extrusion induced by coexpression of p120-mutEE, myr-aPKC and the apoptotic inhibitor XIAP in G2/M-arrested cells. Embryos were injected with a combination of the following constructs: dUAS:Cherry-Wee1;CA-Cdc25, dUAS:p120-mutFF;myr-aPKC and Krt18:XIAP. Movies were taken over 4 hours. Frames were extracted from a representative movie at indicated times from the tailbud stage. Scale bars, 50  $\mu\text{m}$ . (C) Time-lapse imaging of vSrc-like cell extrusion in (B) segmented using the Imaris software. The surface function was used to segment GFP positive cells over time. In this cross section of the embryo (xz view), a cell is undergoing an apicobasal split (apical part is marked with red arrows and the basal part with blue arrows). Scale bars, 25  $\mu\text{m}$ . (D) A schematic model of vSrc-driven cell extrusion. vSrc interferes with the cell cycle, and modulates adherens junctions, cell survival and apicobasal polarity, leading to apicobasal extrusion. vSrc-expressing cell becomes taller than its neighbours. Cell cycle regulators are hijacked; Pp2A is inactivated earlier in the cell cycle, but counteracting Cdk1 inhibition results in G2/M arrest instead of mitosis. The nuclear envelope becomes partially permeable and Anillin is recruited to the adherens junctions by modified p120-catenin, presumably through active RhoA. A contractile junctional ring assembles parallel to the plane of the epithelium, constricts in early mitosis and releases the cell from the epithelium. vSrc-mediated modulation of the apicobasal polarity complex (e.g. aPKC) promotes the predominantly apical direction of extrusion. Immediate cell death is avoided due to vSrc promoting cell survival.

## Discussion

In this report we have used the early zebrafish embryo to study oncogenic extrusion primarily based on high-resolution live imaging. We found that vSrc-mediated apicobasal extrusion is executed by hijacking the cell cycle and rewiring cytokinesis. vSrc drives EVL cells into the G2 phase of the cell cycle and initially blocks further progress. During this period, Src activation leads to the reorganisation of the zonula adherens (ZA) through



534 incorporation of Anillin recruited by vSrc-modified p120-catenin, a component of AJs. With  
535 a contractile junctional ring assembled, the cell enters mitosis and the ring constricts,  
536 facilitating apicobasal extrusion of the vSrc cell. During extrusion, the larger part of the cell  
537 containing the nucleus is released apically. Thus, premature and rewired cytokinesis  
538 occurs in early prophase before NEB or mitotic spindle assembly.

539  
540 Such premature cytokinesis has been described in unfertilised syncytial eggs in  
541 *Drosophila*, which physiologically remain in the M-phase<sup>60</sup>, despite the fact that there are  
542 no microtubule bundles present in these eggs outside of a small peripheral meiotic spindle.  
543 When injected locally with CDK1 inhibitors or an active RhoA, the embryo forms *de novo* a  
544 premature contractile structure that resembles a cytokinetic ring with Actin, Myosin and  
545 Anillin at the site of injection. In our system in the absence of a mitotic spindle, vSrc  
546 appears to generate a narrow zone of active RhoA by modulating p120-catenin<sup>49-51</sup>. This  
547 modulation results in recruitment of the cytokinetic scaffold Anillin and assembly of a  
548 premature misoriented cytokinetic ring by rebuilding the already existing junctional  
549 Actomyosin ring. To resolve the dual roles of RhoA in mediating cytokinesis and junctional  
550 integrity in extruding vSrc cells, optogenetic approaches will be necessary in the future<sup>61</sup>.

551  
552 Transformation of a junctional Actomyosin ring into a contractile ring has been described  
553 previously in the context of apoptotic extrusion, where the ring was formed in the  
554 neighbours<sup>62</sup>. The process relies on the reorganisation of short into co-aligned peri-  
555 junctional Actin bundles. This rearrangement is mediated by the Actin-binding protein  
556 Coronin B1 which is recruited to AJs by E-cadherin. Coronin B1 is not only required to  
557 assemble ZA in epithelial cells, but also to rearrange Actomyosin in the neighbours upon  
558 cell death. When a cell dies within an epithelium, two junctional Actomyosin rings can be  
559 seen at the level of AJs: one in the dying cell and the other in the neighbours. The  
560 neighbouring ring becomes thicker and relocalises basally to facilitate apical extrusion,  
561 while the ring in the dying cell remains stationary. In contrast, during vSrc cell extrusion,  
562 we observe that the autonomous ring changes in structure, becomes contractile and  
563 relocalises from the junctions to an oblique position. Despite being fundamentally different  
564 in terms of the mechanisms for generating force either autonomously or non-  
565 autonomously, these two processes are also remarkably similar. Both rely on modification  
566 of the ZA into a fully contractile ring to facilitate extrusion, and appear to be regulated by  
567 RhoA<sup>63</sup>. While the Actomyosin ring in neighbours of the dying cell is controlled by  
568 p115RhoGEF<sup>64</sup>, nothing is known about regulators of the autonomous contractile ring,  
569 which remain to be identified in the future.

570  
571 Another issue to consider is the non-cell-autonomous contribution to apoptotic and  
572 oncogenic cell extrusion. Micheal et al.<sup>62</sup> show that assembly of a contractile ring in  
573 neighbouring cells depends on apoptotic shrinkage of the dying cell, pulling on the  
574 neighbouring junctions and mechanosensing through E-cadherin. In case of vSrc-induced  
575 extrusion, a cell-autonomous active contraction via the pseudo cytokinetic ring generates a  
576 force that presumably pulls at the AJs of the neighbours. In this scenario, the direction of  
577 the forces that act on neighbouring AJs in dead and oncogenic extrusion is the same, but  
578 the strength would likely differ. Together, these findings raise the intriguing possibility that  
579 the pulling force on E-cadherin determines the mechanism used for extrusion by the  
580 neighbouring cells. Importantly, there is a difference in the non-cell-autonomous response.  
581 The Actin ring in the neighbours is less pronounced in Src-driven extrusion than in

582 apoptotic extrusion<sup>8,63</sup>. Instead, neighbours of transformed cells appear to employ the  
583 Actin cross-linking protein Filamin to facilitate this process<sup>3</sup>. Remarkably, non-autonomous  
584 recruitment of both Actin and Filamin is regulated by RhoA<sup>5,63</sup>. Since p115RhoGEF  
585 regulates RhoA in the neighbours of a dying cell and mediates Actomyosin ring  
586 assembly<sup>64</sup>, another RhoA GEFs/GAPs could be involved in the regulation of RhoA and  
587 Filamin in extrusion of transformed cells. In future studies, it will be crucial to clarify  
588 whether E-cadherin signalling that acts as part of a mechanosensor could be upstream of  
589 differential RhoA activation in the neighbours, and to separate regulators of RhoA  
590 upstream of either Actin or Filamin in each of these processes.

591  
592 It appears that RhoA GEFs/GAPs in transformed cells and their neighbours are also key in  
593 controlling the direction of extrusion: apical - outside of the embryo or basal - towards the  
594 deep cells of the embryo. It has been shown that p115RhoGEF plays a crucial role in  
595 determining where the Actomyosin ring is assembled in the neighbours of a dying cell<sup>64</sup>.  
596 Moreover, a recent study in oncogenic extrusion in the *Drosophila* wing imaginal disk  
597 implicates RhoGEF2, a fly homolog of p115RhoGEF, in determining directionality<sup>65</sup>. The  
598 presence of RhoGEF2 is linked to “tumour hotspots” with predominant apical extrusion  
599 whereas “tumour coldspots” is associated mostly with basal extrusion. However, our  
600 results (Figs. 8B,C) show that autonomous polarity change is sufficient to reverse the  
601 direction of extrusion. These seemingly opposing observations about whether directionality  
602 of extrusion is controlled cell-autonomously or non-cell-autonomously may be consolidated  
603 by the hypothesis that positioning of the ZA in the neighbours could be responsible for  
604 driving extrusion<sup>62</sup>. Since AJs connect transformed cells to their neighbours and give rise  
605 to the Actomyosin ring facilitating extrusion, positioning of the AJs should be crucial to  
606 determine the direction of extrusion and could in theory be regulated from both sides: the  
607 extruding cell and its neighbours.

608  
609 Our data reveal that autonomous regulation of apicobasal polarity is necessary for vSrc-  
610 mediated extrusion (Fig. 8A) and may contribute to regulating its directionality. Recent  
611 findings on apical domain expansion in epithelial cells shed light on how this process could  
612 be involved in extrusion<sup>57,66</sup>. Dbl3 is a regulatory GEF of Cdc42, which has been shown to  
613 be necessary for oncogenic extrusion<sup>7</sup>. Dbl3 is responsible for apical localisation and  
614 activation of Cdc42 and for expansion of the apical domain in epithelial cells through the  
615 regulation of the apical polarity complex aPKC-Par3-Par6. Downstream of Cdc42, the  
616 myosin kinase MRCK promotes myosin flow that separates apical aPKC-Par6 from  
617 junctional Par3, a step crucial for epithelial differentiation. Interestingly, MRCK was found  
618 differentially phosphorylated in H-Ras<sup>V12</sup> cells upon interacting with normal cells prior to  
619 extrusion<sup>6</sup>. It appears that overexpression of Dbl3 promotes apical expansion resembling  
620 rounding up prior to extrusion<sup>66</sup>. Hence, this pathway may play a role in promoting  
621 rounding alongside RhoA in cell cycle-dependent extrusion or possibly on its own in cell  
622 cycle-independent extrusion. Further studies will be necessary to clarify this point.

623  
624 During proliferation and crowding-induced extrusion, normal epithelia have an intrinsic  
625 mechanism of regulating their density, which dictates whether extrusion or division occurs.  
626 Preferential divisions occur in low-density epithelial sites (stretch), while crowding  
627 (squeeze) induces extrusion. This process is mediated by the stretch-activated calcium  
628 channel Piezo1<sup>67</sup>. However, it remains unclear whether this mechanism also functions in  
629 some squamous epithelia, such as the EVL, where all the cells are constantly stretched

630 encasing the yolk and the deep cells. Even less is known as to whether Piezo1 mediates  
631 extrusion of transformed cells. Since vSrc-transformed cells become extruded instead of  
632 dividing, does that mean they somehow imitate crowding? We suspect that Piezo1 may  
633 not be involved in this type of extrusion, as our results indicate that the process of vSrc –  
634 induced extrusion is primarily driven autonomously, thereby resulting in pulling of the  
635 neighbours rather than pushing, which is apparently different to Piezo1-mediated  
636 extrusion. In our view, extrusion of transformed cells resembles cell death-induced  
637 extrusion and, as mentioned above, may employ some of the mechanisms involved in this  
638 process, in regards to the response in the neighbours. Nevertheless, it remains to be  
639 elucidated whether Piezo1 mediates extrusion of transformed cells.

640  
641 Finally, it will be worth investigating whether cell extrusion induced by other oncogenes  
642 occurs in a cell cycle-dependent manner. If the mechanism is similar, blocking proliferation  
643 with drugs while treating carcinogenesis may impair the primary EDAC response and  
644 should be reconsidered.

645  
646 Overall, our study uncovers a novel mechanism underlying EDAC. Further investigation  
647 will allow us to identify regulators of GTPases (in particular, RhoA) that regulate different  
648 aspects of extrusion in both cell-autonomous and cell-non-autonomous mechanisms.  
649 Understanding the coordination of timing, apical polarity and junctional integrity may  
650 eventually lead to potential therapies to boost EDAC.

## 651 652 **Methods**

653  
654 **Generation and maintenance of transgenic fish lines.** The maintenance of fish and the  
655 collection of embryos were performed as described before<sup>68</sup>. The line Tg(Krt18:KaTA4-  
656 ERT2) was previously established<sup>3,10</sup>. To establish Tg(Krt18:Lifeact-Ruby) and  
657 Tg(Krt18:CcnB1-GFP) lines we used the vector pBR-Tol2-Krt18 generated previously<sup>8</sup> and  
658 transferred Lifeact-Ruby<sup>69</sup> and CcnB1-GFP (see Materials), respectively, downstream of  
659 the Krt18 promoter. The resulting constructs (30 pg) were then coinjected with Tol2 RNA  
660 (7.5 pg) in the morpholino buffer (5 mM HEPES pH 7.5, 200 mM KCl) into one-cell wild  
661 type embryos. The embryos positive for RFP (Lifeact-Ruby) and GFP (CcnB1-GFP)  
662 expression at 10 hours post-fertilization (hpf) were raised to adulthood, and crossed with  
663 wild type fish to identify founder fish. Embryos from potential founders were imaged to  
664 select the optimal level of expression at which no overexpression phenotype could be  
665 observed. The founder fish were out-crossed with WT, and the F1 fish were selected on  
666 the basis of their fluorescent signal. All the embryos for experiments were obtained from  
667 crossing fish heterozygous with the Tg(Krt18:KaTA4-ERT2) line.

668  
669 **Microinjection and confocal imaging of zebrafish embryos.** Embryos were injected  
670 with a single construct (16–20 pg) or multiple constructs (combined amount of DNA was 20  
671 pg) and Tol2 RNA (5 pg) in the morpholino buffer (5 mM HEPES pH 7.5, 200 mM KCl) into  
672 the cell at one-cell stage, and treated with 0.5 mM 4-hydroxy tamoxifen (Sigma H7904, a  
673 stock of 5mM in ethanol) at 50-70% epiboly as described<sup>2</sup>. For live imaging, after 2 hours  
674 of treatment, embryos were mounted in 0.8% low-melting agarose in fish water prior to  
675 confocal analysis. For immunofluorescence and quantification of extrusion rates, they were  
676 fixed in 4% PFA/PBS at 2.5-3 h after induction, stained and mounted in 1% low-melting  
677 agarose in PBS prior to confocal analyses. Movies were taken over 4 hours or over 8

678 hours (cell cycle analysis with the Krt18:CcnB1-GFP line). Confocal images were taken  
679 using a 25x 0.95 NA water-immersion lens on a high-resolution single photon microscope  
680 Leica TCS SP8 and were analysed using the Imaris software (Bitplane).

681  
682 **Immunostaining of fish embryos.** At 10 hpf GFP- or RFP-positive embryos were  
683 selected and dechorionated in 1% agarose plates to avoid damage. Embryos were fixed in  
684 a fresh solution of 4% PFA/PBS overnight at 4°C and subsequently washed 3x in PBS.  
685 Permeabilisation was performed for 15 min in PBS/0.5%TritonX-100 (PBSTr). Blocking in  
686 PBSTr/10% Goat serum/1% DMSO (Blocking buffer) lasted >1 h. Embryos were incubated  
687 with 1<sup>st</sup> antibody in 200 µl in Blocking buffer @ 4°C O/N, then washed with PBSTr 3-6x for  
688 30 min in total. Incubation with 2<sup>nd</sup> antibody in 200 µl Blocking buffer lasted 3-4 hours at  
689 room temperature, followed by washes with PBSTr 3-6x for 30 min in total. Phalloidin  
690 staining was performed for 30 min in PBSTr/ 10% Goat serum.

691  
692 **Cell culture experiments.** MDCK cell lines were used in this study. The parental MDCK  
693 cells were a gift from Walter Birchmeier. MDCK and MDCK-pTR cSrc-Y527F-GFP lines  
694 were cultured as previously described<sup>7,70</sup>. To establish MDCK-pTR cSrc-Y527F-GFP line  
695 stably expressing FUCCI cell cycle markers mCherry-hCdt1(30/120) and mTurquoise-  
696 hGem(1/110), MDCK-pTR-cSrc-Y527F-GFP cells were transfected with P2A  
697 Fucci2.2\_pCSII-CMV vector (a kind gift from Dr. Miyawaki) together with a pcDNA3.1 as a  
698 selection vector using Lipofectamine 2000 (Life Technologies), followed by selection in the  
699 medium containing 800 µg/mL of G418 (Gibco), 5 µg/mL of blasticidin, and 400 µg/mL of  
700 zeocin. To induce Src-expression, 2 µg ml<sup>-1</sup> of tetracycline (Sigma-Aldrich) was added to  
701 the medium. For immunofluorescence and time-lapse experiments, cells were cultured on  
702 type-I collagen gels from Nitta Gelatin (Nitta Cellmatrix type 1-A; Osaka, Japan) as  
703 previously described<sup>7</sup>. For immunofluorescence, mixed cultures of cells (MDCK : Src = 50  
704 : 1) were plated and incubated for 8 hours, before adding tetracycline. To avoid differences  
705 in cell density which could affect extrusion rates, proliferation inhibitors were added to the  
706 medium 16 hours after tetracycline at following concentrations: hydroxyurea (2 mM) or Ro-  
707 3306 (10 µM). Cells were fixed and stained as described previously<sup>6</sup>. Immunofluorescence  
708 images were taken with the Olympus FV1000 or FV1200 system and Olympus FV10-ASW  
709 software. Images were analysed with MetaMorph software (Universal imaging). For time-  
710 lapse imaging, following a 4 hour-tetracycline treatment, small groups of GFP-positive cells  
711 were chosen for imaging with Olympus IX81-ZDC”(Olympus) and images were taken and  
712 analysed with Metamorph software (Molecular Devices). For Western blotting cells were  
713 plated in plastic dishes and induced with tetracycline for 8 hours before lysis. Western  
714 blotting was carried out as previously described<sup>71</sup>. Primary antibodies were used at  
715 1:1000. The western blotting data were analysed using ImageJ (NIH). For FACS analysis,  
716 MDCK cells were incubated with or without proliferation inhibitors as before for 16 hours  
717 prior to staining with Hoechst 33342 dye (1 ug/uL; ThermoFisher Scientific). After  
718 trypsinisation and straining, cells were counted, resuspended in 2% FBS/PBS, stained with  
719 propidium iodide and analysed for DNA content using FACSAria™ II (BD Biosciences).

720  
721 **Data analysis.** For data analyses, two-tailed Student’s t-tests were used to determine P-  
722 values. P-values less than 0.05 were considered to be significant. Extrusion rates in fixed  
723 embryos were expressed as the number of “extruded” and “tall” cells (unless indicated  
724 otherwise) by the total number of GFP- or RFP-positive cells in the embryo. As “extruded”  
725 we classified cells that are no longer a part of the monolayer (their junctions closed off or



726 nearly closed off up to 90%). As “tall” we classified cells that were at least double the  
727 height of an average EVL cell, displaying signs of early extrusion, such as rounding. Only  
728 embryos with between 5-50 GFP- or RFP-positive cells were taken into consideration.  
729 Proliferation rates in living embryos were expressed as the number of divisions over 4  
730 hours by the total number of cells at the beginning of the movie. Only embryos with  
731 between 5-35 GFP- or RFP-positive cells were taken into consideration. To measure  
732 chromatin volume, H2B-GFP signal was used to segment the GFP-positive region in the  
733 cell undergoing division or extrusion over time using the surface function of Imaris  
734 software. A constant threshold was used to avoid bias between different movies. The  
735 moment of mitosis or extrusion was set as point 0 and volumes from different movies were  
736 aligned according to time before and after extrusion and averaged to create graph Fig. 3G.  
737 To measure the intensity of the CcnB1-GFP signal, segmentation was performed in the red  
738 channel on the basis of the signal from the cell surface marker myr-Cherry using the  
739 surface function of the Imaris software. The segmented cell surface was then used to  
740 calculate the average intensity of the green channel and cell volume (Fig. 4D, E, F). To  
741 define the position of the Anillin ring, Imaris spot function was used to determine points  
742 within the plane of the ring and the plane of the surface of the embryo. Extracted  
743 coordinates of the spots were then fed into a MATLAB function (based on `affine_fit(X)`) to  
744 calculate the angle between two planes (Fig. 2E).

745  
746 **Data availability statement.** The datasets generated and/or analysed during the current  
747 study are available from the corresponding author on reasonable request.

748  
749 **Code availability statement.** MatLab code used to quantify the angle of the Anillin ring  
750 will be released upon publication.

751  
752 **References**

- 753  
754 1 Kajita, M. & Fujita, Y. EDAC: Epithelial defence against cancer-cell competition between  
755 normal and transformed epithelial cells in mammals. *J Biochem* **158**, 15-23,  
756 doi:10.1093/jb/mvv050 (2015).  
757 2 Hill, W. & Hogan, C. Normal epithelial cells trigger EphA2-dependent RasV12 cell  
758 repulsion at the single cell level. *Small GTPases*, 1-6,  
759 doi:10.1080/21541248.2017.1324940 (2017).  
760 3 Kajita, M. *et al.* Filamin acts as a key regulator in epithelial defence against transformed  
761 cells. *Nat Commun* **5**, 4428, doi:10.1038/ncomms5428 (2014).  
762 4 Porazinski, S. *et al.* EphA2 Drives the Segregation of Ras-Transformed Epithelial Cells  
763 from Normal Neighbors. *Curr Biol* **26**, 3220-3229, doi:10.1016/j.cub.2016.09.037  
764 (2016).  
765 5 Yamamoto, S. *et al.* A role of the sphingosine-1-phosphate (S1P)-S1P receptor 2  
766 pathway in epithelial defense against cancer (EDAC). *Mol Biol Cell* **27**, 491-499,  
767 doi:10.1091/mbc.E15-03-0161 (2016).  
768 6 Anton, K. A. *et al.* PKA-regulated VASP phosphorylation promotes extrusion of  
769 transformed cells from the epithelium. *J Cell Sci* **127**, 3425-3433,  
770 doi:10.1242/jcs.149674 (2014).  
771 7 Hogan, C. *et al.* Characterization of the interface between normal and transformed  
772 epithelial cells. *Nat Cell Biol* **11**, 460-467, doi:10.1038/ncb1853 (2009).



- 773 8 Kajita, M. *et al.* Interaction with surrounding normal epithelial cells influences  
774 signalling pathways and behaviour of Src-transformed cells. *J Cell Sci* **123**, 171-180,  
775 doi:10.1242/jcs.057976 (2010).
- 776 9 Kon, S. *et al.* Cell competition with normal epithelial cells promotes apical extrusion of  
777 transformed cells through metabolic changes. *Nat Cell Biol* **19**, 530-541,  
778 doi:10.1038/ncb3509 (2017).
- 779 10 Saitoh, S. *et al.* Rab5-regulated endocytosis plays a crucial role in apical extrusion of  
780 transformed cells. *Proc Natl Acad Sci U S A* **114**, E2327-E2336,  
781 doi:10.1073/pnas.1602349114 (2017).
- 782 11 Slattum, G., Gu, Y., Sabbadini, R. & Rosenblatt, J. Autophagy in oncogenic K-Ras  
783 promotes basal extrusion of epithelial cells by degrading S1P. *Curr Biol* **24**, 19-28,  
784 doi:10.1016/j.cub.2013.11.029 (2014).
- 785 12 Lo, C. M., Wang, H. B., Dembo, M. & Wang, Y. L. Cell movement is guided by the rigidity  
786 of the substrate. *Biophys J* **79**, 144-152, doi:10.1016/S0006-3495(00)76279-5 (2000).
- 787 13 Streuli, C. H. Integrins as architects of cell behavior. *Mol Biol Cell* **27**, 2885-2888,  
788 doi:10.1091/mbc.E15-06-0369 (2016).
- 789 14 Macara, I. G., Guyer, R., Richardson, G., Huo, Y. & Ahmed, S. M. Epithelial homeostasis.  
790 *Curr Biol* **24**, R815-825, doi:10.1016/j.cub.2014.06.068 (2014).
- 791 15 Behrndt, M. *et al.* Forces driving epithelial spreading in zebrafish gastrulation. *Science*  
792 **338**, 257-260, doi:10.1126/science.1224143 (2012).
- 793 16 Perez-Garijo, A., Shlevkov, E. & Morata, G. The role of Dpp and Wg in compensatory  
794 proliferation and in the formation of hyperplastic overgrowths caused by apoptotic  
795 cells in the *Drosophila* wing disc. *Development* **136**, 1169-1177,  
796 doi:10.1242/dev.034017 (2009).
- 797 17 Hacker, G. The morphology of apoptosis. *Cell Tissue Res* **301**, 5-17 (2000).
- 798 18 Lagace, M. *et al.* Genomic organization of the X-linked inhibitor of apoptosis and  
799 identification of a novel testis-specific transcript. *Genomics* **77**, 181-188,  
800 doi:10.1006/geno.2001.6635 (2001).
- 801 19 Schwayer, C., Sikora, M., Slovakova, J., Kardos, R. & Heisenberg, C. P. Actin Rings of  
802 Power. *Dev Cell* **37**, 493-506, doi:10.1016/j.devcel.2016.05.024 (2016).
- 803 20 Piekny, A. J. & Glotzer, M. Anillin is a scaffold protein that links RhoA, actin, and myosin  
804 during cytokinesis. *Curr Biol* **18**, 30-36, doi:10.1016/j.cub.2007.11.068 (2008).
- 805 21 Bringmann, H. & Hyman, A. A. A cytokinesis furrow is positioned by two consecutive  
806 signals. *Nature* **436**, 731-734, doi:10.1038/nature03823 (2005).
- 807 22 Hickson, G. R. & O'Farrell, P. H. Rho-dependent control of anillin behavior during  
808 cytokinesis. *J Cell Biol* **180**, 285-294, doi:10.1083/jcb.200709005 (2008).
- 809 23 Somers, W. G. & Saint, R. A RhoGEF and Rho family GTPase-activating protein complex  
810 links the contractile ring to cortical microtubules at the onset of cytokinesis. *Dev Cell* **4**,  
811 29-39 (2003).
- 812 24 Wagner, E. & Glotzer, M. Local RhoA activation induces cytokinetic furrows  
813 independent of spindle position and cell cycle stage. *J Cell Biol* **213**, 641-649,  
814 doi:10.1083/jcb.201603025 (2016).
- 815 25 Field, C. M. & Alberts, B. M. Anillin, a contractile ring protein that cycles from the  
816 nucleus to the cell cortex. *J Cell Biol* **131**, 165-178 (1995).
- 817 26 Paolini, A. *et al.* Asymmetric inheritance of the apical domain and self-renewal of  
818 retinal ganglion cell progenitors depend on Anillin function. *Development* **142**, 832-  
819 839, doi:10.1242/dev.118612 (2015).

- 820 27 Reyes, C. C. *et al.* Anillin regulates cell-cell junction integrity by organizing junctional  
821 accumulation of Rho-GTP and actomyosin. *Curr Biol* **24**, 1263-1270,  
822 doi:10.1016/j.cub.2014.04.021 (2014).
- 823 28 Wang, G. *et al.* Overexpression of Anillin (ANLN) is correlated with colorectal cancer  
824 progression and poor prognosis. *Cancer Biomark* **16**, 459-465, doi:10.3233/CBM-  
825 160585 (2016).
- 826 29 Tian, D. *et al.* Anillin Regulates Neuronal Migration and Neurite Growth by Linking  
827 RhoG to the Actin Cytoskeleton. *Curr Biol* **25**, 1135-1145,  
828 doi:10.1016/j.cub.2015.02.072 (2015).
- 829 30 Lancaster, O. M. *et al.* Mitotic rounding alters cell geometry to ensure efficient bipolar  
830 spindle formation. *Dev Cell* **25**, 270-283, doi:10.1016/j.devcel.2013.03.014 (2013).
- 831 31 Robu, M. E., Zhang, Y. & Rhodes, J. Rereplication in *emi1*-deficient zebrafish embryos  
832 occurs through a *Cdh1*-mediated pathway. *PLoS One* **7**, e47658,  
833 doi:10.1371/journal.pone.0047658 (2012).
- 834 32 Huber, M. D. & Gerace, L. The size-wise nucleus: nuclear volume control in eukaryotes. *J*  
835 *Cell Biol* **179**, 583-584, doi:10.1083/jcb.200710156 (2007).
- 836 33 Pines, J. & Hunter, T. Isolation of a human cyclin cDNA: evidence for cyclin mRNA and  
837 protein regulation in the cell cycle and for interaction with p34cdc2. *Cell* **58**, 833-846  
838 (1989).
- 839 34 Wieser, S. & Pines, J. The biochemistry of mitosis. *Cold Spring Harb Perspect Biol* **7**,  
840 a015776, doi:10.1101/cshperspect.a015776 (2015).
- 841 35 Bouldin, C. M., Snelson, C. D., Farr, G. H., 3rd & Kimelman, D. Restricted expression of  
842 *cdc25a* in the tailbud is essential for formation of the zebrafish posterior body. *Genes*  
843 *Dev* **28**, 384-395, doi:10.1101/gad.233577.113 (2014).
- 844 36 Sakaue-Sawano, A. *et al.* Visualizing spatiotemporal dynamics of multicellular cell-cycle  
845 progression. *Cell* **132**, 487-498, doi:10.1016/j.cell.2007.12.033 (2008).
- 846 37 Sugiyama, M. *et al.* Illuminating cell-cycle progression in the developing zebrafish  
847 embryo. *Proc Natl Acad Sci U S A* **106**, 20812-20817, doi:10.1073/pnas.0906464106  
848 (2009).
- 849 38 Zielke, N. *et al.* Fly-FUCCI: A versatile tool for studying cell proliferation in complex  
850 tissues. *Cell Rep* **7**, 588-598, doi:10.1016/j.celrep.2014.03.020 (2014).
- 851 39 Jackman, M., Lindon, C., Nigg, E. A. & Pines, J. Active cyclin B1-Cdk1 first appears on  
852 centrosomes in prophase. *Nat Cell Biol* **5**, 143-148, doi:10.1038/ncb918 (2003).
- 853 40 Li, J., Meyer, A. N. & Donoghue, D. J. Nuclear localization of cyclin B1 mediates its  
854 biological activity and is regulated by phosphorylation. *Proc Natl Acad Sci U S A* **94**,  
855 502-507 (1997).
- 856 41 Mochida, S., Ikeo, S., Gannon, J. & Hunt, T. Regulated activity of PP2A-B55 delta is  
857 crucial for controlling entry into and exit from mitosis in *Xenopus* egg extracts. *EMBO J*  
858 **28**, 2777-2785, doi:10.1038/emboj.2009.238 (2009).
- 859 42 Barisic, S., Schmidt, C., Walczak, H. & Kulms, D. Tyrosine phosphatase inhibition  
860 triggers sustained canonical serine-dependent NFkappaB activation via Src-dependent  
861 blockade of PP2A. *Biochem Pharmacol* **80**, 439-447, doi:10.1016/j.bcp.2010.04.028  
862 (2010).
- 863 43 Cheng, H. C., Nishio, H., Hatase, O., Ralph, S. & Wang, J. H. A synthetic peptide derived  
864 from p34cdc2 is a specific and efficient substrate of src-family tyrosine kinases. *J Biol*  
865 *Chem* **267**, 9248-9256 (1992).
- 866 44 Hagarat, N., Rata, S. & Hochegger, H. Bistability of mitotic entry and exit switches  
867 during open mitosis in mammalian cells. *Bioessays* **38**, 627-643,  
868 doi:10.1002/bies.201600057 (2016).

- 869 45 Potapova, T. A., Sivakumar, S., Flynn, J. N., Li, R. & Gorbsky, G. J. Mitotic progression  
870 becomes irreversible in prometaphase and collapses when Wee1 and Cdc25 are  
871 inhibited. *Mol Biol Cell* **22**, 1191-1206, doi:10.1091/mbc.E10-07-0599 (2011).
- 872 46 Kapitein, L. C. *et al.* The bipolar mitotic kinesin Eg5 moves on both microtubules that it  
873 crosslinks. *Nature* **435**, 114-118, doi:10.1038/nature03503 (2005).
- 874 47 Skoufias, D. A. *et al.* S-trityl-L-cysteine is a reversible, tight binding inhibitor of the  
875 human kinesin Eg5 that specifically blocks mitotic progression. *J Biol Chem* **281**,  
876 17559-17569, doi:10.1074/jbc.M511735200 (2006).
- 877 48 Arnold, T. R., Stephenson, R. E. & Miller, A. L. Rho GTPases and actomyosin: Partners in  
878 regulating epithelial cell-cell junction structure and function. *Exp Cell Res* **358**, 20-30,  
879 doi:10.1016/j.yexcr.2017.03.053 (2017).
- 880 49 van de Ven, R. A. *et al.* p120-catenin prevents multinucleation through control of  
881 MKLP1-dependent RhoA activity during cytokinesis. *Nat Commun* **7**, 13874,  
882 doi:10.1038/ncomms13874 (2016).
- 883 50 Mariner, D. J. *et al.* Identification of Src phosphorylation sites in the catenin p120ctn. *J*  
884 *Biol Chem* **276**, 28006-28013, doi:10.1074/jbc.M102443200 (2001).
- 885 51 Castano, J. *et al.* Specific phosphorylation of p120-catenin regulatory domain  
886 differently modulates its binding to RhoA. *Mol Cell Biol* **27**, 1745-1757,  
887 doi:10.1128/MCB.01974-06 (2007).
- 888 52 Tu, S., Wu, W. J., Wang, J. & Cerione, R. A. Epidermal growth factor-dependent  
889 regulation of Cdc42 is mediated by the Src tyrosine kinase. *J Biol Chem* **278**, 49293-  
890 49300, doi:10.1074/jbc.M307021200 (2003).
- 891 53 Etienne-Manneville, S. Cdc42--the centre of polarity. *J Cell Sci* **117**, 1291-1300,  
892 doi:10.1242/jcs.01115 (2004).
- 893 54 Goldstein, B. & Macara, I. G. The PAR proteins: fundamental players in animal cell  
894 polarization. *Dev Cell* **13**, 609-622, doi:10.1016/j.devcel.2007.10.007 (2007).
- 895 55 Joberty, G., Petersen, C., Gao, L. & Macara, I. G. The cell-polarity protein Par6 links Par3  
896 and atypical protein kinase C to Cdc42. *Nat Cell Biol* **2**, 531-539,  
897 doi:10.1038/35019573 (2000).
- 898 56 Kay, A. J. & Hunter, C. P. CDC-42 regulates PAR protein localization and function to  
899 control cellular and embryonic polarity in *C. elegans*. *Curr Biol* **11**, 474-481 (2001).
- 900 57 Zihni, C. *et al.* Dbl3 drives Cdc42 signaling at the apical margin to regulate junction  
901 position and apical differentiation. *J Cell Biol* **204**, 111-127,  
902 doi:10.1083/jcb.201304064 (2014).
- 903 58 Sabherwal, N. *et al.* The apicobasal polarity kinase aPKC functions as a nuclear  
904 determinant and regulates cell proliferation and fate during *Xenopus* primary  
905 neurogenesis. *Development* **136**, 2767-2777, doi:10.1242/dev.034454 (2009).
- 906 59 Thomas, S. M. & Brugge, J. S. Cellular functions regulated by Src family kinases. *Annu*  
907 *Rev Cell Dev Biol* **13**, 513-609, doi:10.1146/annurev.cellbio.13.1.513 (1997).
- 908 60 Menant, A. & Karess, R. E. Inducing "cytokinesis" without mitosis in unfertilized  
909 *Drosophila* eggs. *Cell Cycle* **11**, 2856-2863, doi:10.4161/cc.21190 (2012).
- 910 61 Buckley, C. E. *et al.* Reversible Optogenetic Control of Subcellular Protein Localization  
911 in a Live Vertebrate Embryo. *Dev Cell* **36**, 117-126, doi:10.1016/j.devcel.2015.12.011  
912 (2016).
- 913 62 Michael, M. *et al.* Coronin 1B Reorganizes the Architecture of F-Actin Networks for  
914 Contractility at Steady-State and Apoptotic Adherens Junctions. *Dev Cell* **37**, 58-71,  
915 doi:10.1016/j.devcel.2016.03.008 (2016).

- 916 63 Rosenblatt, J., Raff, M. C. & Cramer, L. P. An epithelial cell destined for apoptosis signals  
917 its neighbors to extrude it by an actin- and myosin-dependent mechanism. *Curr Biol*  
918 **11**, 1847-1857 (2001).
- 919 64 Slattum, G., McGee, K. M. & Rosenblatt, J. P115 RhoGEF and microtubules decide the  
920 direction apoptotic cells extrude from an epithelium. *J Cell Biol* **186**, 693-702,  
921 doi:10.1083/jcb.200903079 (2009).
- 922 65 Tamori, Y., Suzuki, E. & Deng, W. M. Epithelial Tumors Originate in Tumor Hotspots, a  
923 Tissue-Intrinsic Microenvironment. *PLoS Biol* **14**, e1002537,  
924 doi:10.1371/journal.pbio.1002537 (2016).
- 925 66 Zihni, C. *et al.* An apical MRCK-driven morphogenetic pathway controls epithelial  
926 polarity. *Nat Cell Biol* **19**, 1049-1060, doi:10.1038/ncb3592 (2017).
- 927 67 Gudipaty, S. A. *et al.* Mechanical stretch triggers rapid epithelial cell division through  
928 Piezo1. *Nature* **543**, 118-121, doi:10.1038/nature21407 (2017).
- 929 68 Westerfield, M. *The zebrafish book. A guide for the laboratory use of zebrafish (Danio*  
930 *rerio)*. 4th edn, (Univ. of Oregon Press, Eugene., 2000).
- 931 69 Riedl, J. *et al.* Lifeact mice for studying F-actin dynamics. *Nat Methods* **7**, 168-169,  
932 doi:10.1038/nmeth0310-168 (2010).
- 933 70 Ohoka, A. *et al.* EPLIN is a crucial regulator for extrusion of RasV12-transformed cells. *J*  
934 *Cell Sci* **128**, 781-789, doi:10.1242/jcs.163113 (2015).
- 935 71 Hogan, C. *et al.* Rap1 regulates the formation of E-cadherin-based cell-cell contacts. *Mol*  
936 *Cell Biol* **24**, 6690-6700, doi:10.1128/MCB.24.15.6690-6700.2004 (2004).
- 937 72 Laranjeiro, R. *et al.* Cyclin-dependent kinase inhibitor p20 controls circadian cell-cycle  
938 timing. *Proc Natl Acad Sci U S A* **110**, 6835-6840, doi:10.1073/pnas.1217912110  
939 (2013).
- 940 73 Peyric, E., Moore, H. A. & Whitmore, D. Circadian clock regulation of the cell cycle in the  
941 zebrafish intestine. *PLoS One* **8**, e73209, doi:10.1371/journal.pone.0073209 (2013).
- 942 74 Ossipova, O., Tabler, J., Green, J. B. & Sokol, S. Y. PAR1 specifies ciliated cells in  
943 vertebrate ectoderm downstream of aPKC. *Development* **134**, 4297-4306,  
944 doi:10.1242/dev.009282 (2007).
- 945 75 Tran, L. D. *et al.* Dynamic microtubules at the vegetal cortex predict the embryonic axis  
946 in zebrafish. *Development* **139**, 3644-3652, doi:10.1242/dev.082362 (2012).
- 947 76 Scarpa, E. *et al.* Cadherin Switch during EMT in Neural Crest Cells Leads to Contact  
948 Inhibition of Locomotion via Repolarization of Forces. *Dev Cell* **34**, 421-434,  
949 doi:10.1016/j.devcel.2015.06.012 (2015).
- 950 77 Buckley, C. E. *et al.* Mirror-symmetric microtubule assembly and cell interactions drive  
951 lumen formation in the zebrafish neural rod. *EMBO J* **32**, 30-44,  
952 doi:10.1038/emboj.2012.305 (2013).

953 |

## 954 **Acknowledgements**

955 We thank members of the Wilson, Rihel, Bianco and Tada labs for help, advice and  
956 sharing reagents, and the UCL fish facility for excellent zebrafish care. We would like to  
957 thank David Whitmore, David Kimelman, Sergei Sokol, Marina Mione, Jon Clarke, Luccia  
958 Poggi, Roberto Mayor, Caroline Brennan for constructs they provided. We especially  
959 would like to thank Buzz Baum, Karl Matter, Jon Clarke, Richard Poole and Snezhka  
960 Oliferenko for critical reading of the manuscript and advice. This work is funded by the  
961 Cancer Research UK. YF was supported by Japan Society for the Promotion of Science  
962 (JSPS) Grant-in-Aid for Scientific Research on Innovative Areas 26114001, Grant-in-Aid  
963 for Scientific Research (A) 26250026, the Naito Foundation, and the Takeda Science  
964 Foundation.



965

## 966 **Author contributions**

967

968 K.A. designed experiments, generated and analysed most of the data. M.K. generated  
969 MDCK-FUCCI line. K.A., M.K. and R.N. performed live-imaging in MDCK cells. R.N.  
970 performed Western blots in MDCK cells. M.T. conceived and designed the fish model  
971 system and generated fish lines. Y.F. conceived and designed the MDCK model system.  
972 K.A. and M.T. conceived and designed the study. The manuscript was written by K.A. and  
973 M.T. with assistance from the other authors.

974

## 975 **Competing financial interests**

976

977 The authors declare no competing financial interests.

## 978 **Materials**

979 **Constructs.** All the constructs used for experiments were based on the pBR-Tol2 vector  
980 with either Krt18 promoter or the 5xUAS element driving expression in one (UAS, Krt18) or  
981 both (dUAS, dKrt18) directions<sup>3,8,10</sup>. To generate the dKrt18 vector, we placed the  
982 endogenous basal promoter (-150 bp from the transcription starting site of *krt18* gene) to -  
983 5kb upstream of the EVL-regulatory sequence of the Krt18 promoter in the reverse  
984 complementary orientation (see Fig S1). Previously published constructs used in this work  
985 were: dUAS:EGFP-vSrc<sup>10</sup>, UAS:EGFP-vSrc<sup>3,10</sup>, UAS:myr-Cherry-vSrc<sup>3</sup>. On the basis of the  
986 four basic pBR-Tol2 vectors with single or double promoters we created a number of new  
987 constructs using the InFusion system (Clontech). To make new constructs in most cases  
988 we used cDNA from zebrafish embryos unless otherwise indicated. The following  
989 previously cloned cDNAs were gifts: Wee1, p20 and p21 from David Whitmore<sup>72,73</sup>, CA-  
990 Cdc25 (Cdc25-3S/T-A) from David Kimelman<sup>35</sup>, aPKC (rat) from Sergei Sokol<sup>74</sup>, Dcx-GFP  
991 from Marina Mione<sup>75</sup>, H2B-GFP from Jon Clarke, Anillin from Luccia Poggi<sup>26</sup>, p120-wt  
992 (mouse) from Roberto Mayor<sup>76</sup>, DAPK1 from Caroline Brennan. The following cDNAs were  
993 cloned from a cDNA library created using 24-hour old zebrafish embryos: Pp2a (ZDB-  
994 GENE-050417-441), RhoA (ZDB-GENE-040426-2150), CcnB1 (ZDB-GENE-000406-10),  
995 Cdk1 (ZDB-GENE-010320-1), XIAP (ZDB-GENE-030825-7) based on the ZFIN database.  
996 Indicated point mutations and deletions were achieved using the InFusion method  
997 (Clontech) and confirmed by sequencing (Source BioScience). The specific created  
998 mutations were: Y307F in CA-Pp2a, Q63L in CA-RhoA, T19N in DN-RhoA, T14A and  
999 Y15F in CA-Cdk1,  $\Delta$ (1-740) in DN-Anillin,  $\Delta$ (201-591) in DN-aPKC, Y217,228F in p120-  
1000 mutFF, Y217,228E in p120-mutEE. nucGFP was created by fusing 2xNLS Sv40 with NLS  
1001 from Wee1 (RNNRKRSHWN), hmAzami-Green and EGFP. CDK1pep expressing  
1002 construct was created by fusing FLAG, mKO2 fluorophore, CDK1 peptide  
1003 (KIEKIGEGTYGVVYK) and 2xHA tag.

1004 On the basis of the dUAS:EGFP-vSrc construct we created: dUAS:EGFP-vSrc;Wee1,  
1005 dUAS:EGFP-vSrc;CA-Cdc25, dUAS:EGFP-vSrc;p20, dUAS:EGFP-vSrc;p21, dUAS:EGFP-  
1006 vSrc;Pp2a-Y307F, dUAS:EGFP-vSrc;CA-RhoA, dUAS:EGFP-vSrc;DN-RhoA and  
1007 dUAS:EGFP-vSrc;DN-aPKC. We also replaced the EGFP in the dUAS:EGFP-vSrc  
1008 construct with myr-Cherry to obtain dUAS:myr-Cherry-vSrc and subsequently used it to  
1009 make the following constructs: dUAS:myr-Cherry-vSrc;XIAP, dUAS:myr-Cherry-vSrc;Dcx-  
1010 GFP, dUAS:myr-Cherry-vSrc;H2B-GFP, dUAS:myr-Cherry-vSrc;nucGFP, dUAS:myr-



1011 Cherry-vSrc;Anillin-GFP, dUAS:myr-Cherry-vSrc;DN-Anillin-GFP, dUAS:myr-Cherry-  
1012 vSrc;p120-wt, dUAS:myr-Cherry-vSrc;p120-mutFF. We used the original pBR-Tol2-dUAS  
1013 vector to create the following constructs: dUAS:Cherry-Wee1;CA-Cdc25, dUAS:p120-  
1014 mutEE;AnillinGFP, dUAS:myr-Cherry;AnillinGFP, dUAS:p120-mutFF;AnillinGFP,  
1015 dUAS:p120-mutFF;myr-aPKC, dUAS:myr-Cherry;GFP-Emerin, dUAS:Dcx-GFP;H2B-RFP,  
1016 dUAS:myr-Cherry;H2B-GFP, dUAS:myr-Cherry;Anillin-GFP, dUAS:GFP-CAAX;CA-RhoA,  
1017 dUAS:myr-Cherry;DAPK1. We used the pBR-Tol2-UAS to create: UAS:myr-Cherry. We  
1018 used pBR-Tol2-Krt18 to create the following constructs: Krt18:XIAP, Krt18:CcnB1-GFP.  
1019 We used the pBR-Tol2-dKrt18 to create the following constructs: dKrt18:H2B-GFP;myr-  
1020 Cherry, dKrt18:myr-Cherry, dKrt18:Cherry-Wee1 and dKrt18:Cherry-Wee1;CA-Cdk1.

1021  
1022 **Antibodies, morpholinos and inhibitors.** Anti-GFP antibody was from Abcam (13970).  
1023 Anti-RFP antibody was from MBL (PM005). Anti-phospho-CDK1 Tyr15 antibody was from  
1024 Cell Signaling (4539). Anti-phospho-MLC2 Thr18/Ser19 antibody was from Cell Signaling  
1025 (3674). Anti-phospho-Histone H3 Ser10 antibody was from Upstate (MERCK: 06-570).  
1026 Anti-active Caspase 3 antibody was from BD Biosciences (559565). Secondary antibodies  
1027 were from Invitrogen Molecular Probes. Phalloidin-Atto 647N was from Sigma.  
1028 For knockdown experiments in zebrafish, we used Emi1 MO<sup>77</sup>, a gift from Jon Clarke. 1 nL  
1029 of 0.5 mM morpholino (Emi1 MO or control MO) solution was injected into the yolk  
1030 following a DNA injection. For chemical inhibition of proliferation, we used aphidocholin  
1031 (150  $\mu$ M) and hydroxyurea (20 mM) from Sigma in fish water containing 4% DMSO.  
1032 Inhibitors were added together with tamoxifen, at 50-70% epiboly. To generate mitotic  
1033 spindle defects, Eg5 (Kif11) inhibitor STLC from Alfa Aesar was used at 0.874 mM added  
1034 together with tamoxifen, at 50-70% epiboly and during imaging.
